# Supplementary material
Source: publisher figshare collection journal article supplement (https://acs.figshare.com/ndownloader/files/30577450)
Supplement: Supplementary file 1 [file 30577450]

## Sheet: Info
	Detailed Chemical Kinetic Study of Acetaldehyde Oxidation and Its Interaction with NOx
	Krishna Prasad Shrestha1, *, Binod Raj Giri2, *, Mohammad Adil2, Lars Seidel3, Thomas Zeuch4, Aamir Farooq2, Fabian Mauss1
		1. Thermodynamics and Thermal Process Engineering, Brandenburg University of Technology, 03046 Cottbus, Germany
		2. Clean Combustion Research Center, Physical Sciences and Engineering Division, King Abdullah University of Science and Technology (KAUST), Thuwal 23955-6900, Saudi Arabia
		3. LOGE Deutschland GmbH, Querstrasse 48, 03044 Cottbus, Germany
		4. Institut für Physikalische Chemie, Georg-August-Universität Göttingen, Göttingen, Germany
	Corresponding authors*: Krishna Prasad Shrestha, e-mail: shrestha@b-tu.de
			Binod Raj Giri, e-mail: binod.giri@kaust.edu.sa
	Submitted to Energy and Fuels
						https://doi.org/10.1021/acs.energyfuels.1c01948

## Sheet: IDT
Temp[K]	Thousand/Temp (K)	Sim_phi = 0.5 @ 1 bar	Sim_phi = 1 @ 1.2 bar			Temp[K]	Thousand/Temp (K)	IDT (ms)	IDT (ms)		Temp[K]	Thousand/Temp (K)	IDT (ms)	IDT (ms)
1000	1	20000	20000			1302	0.768049	1071.17	1.07117		1248.6	0.800897	1002.71	1.00271
1020	0.980392	20000	16955.7			1294	0.772798	1255.27	1.25527		1312.9	0.761673	543.12	0.54312
1040	0.961538	19720.6	12929.1			1268.5	0.788333	1978.61	1.97861		1395.9	0.716384	211.89	0.21189
1060	0.943396	15180.5	9978.63			1265.5	0.790202	2196.65	2.19665		1366.3	0.731904	278.852	0.278852
1080	0.925926	11807.4	7782.68			1499.7	0.6668	142.777	0.142777		1214.4	0.823452	2007.4	2.0074
1100	0.909091	9256.75	6121.27			1382.5	0.723327	491.161	0.491161		1251.6	0.798977	1063.77	1.06377
1120	0.892857	7296.29	4844.62			1148.8	0.870474	4474.23	4.47423		1191.6	0.839208	2456.29	2.45629
1140	0.877193	5769.19	3850.51			1541.8	0.648593	105.7	0.1057		1412.2	0.708115	169.494	0.169494
1160	0.862069	4567.85	3068.38								1474.1	0.67838	104.764	0.104764
1180	0.847458	3616.89	2448.5								1425.6	0.701459	150.333	0.150333
1200	0.833333	2862.02	1955.03
1220	0.819672	2262.66	1561.37
1240	0.806452	1787.59	1247.18
1260	0.793651	1411.89	996.605
1280	0.78125	1115.7	797.043
1300	0.769231	882.812	638.308
1320	0.757576	700.015	512.2
1340	0.746269	556.869	412.088
1360	0.735294	444.663	332.61
1380	0.724638	356.782	269.553
1400	0.714286	287.798	219.398
1420	0.704225	233.529	179.443
1440	0.694444	190.721	147.581
1460	0.684932	156.791	122.034
1480	0.675676	129.838	101.538
1500	0.666667	108.31	85.0156
1520	0.657895	90.9873	71.6259
1540	0.649351	76.9619	60.7309
1560	0.641026	65.5781	51.8195
1580	0.632911	56.2948	44.4853
1600	0.625	48.6542	38.4541

## Sheet: acetaldehyde-profiles-phi-1
	Measured absorbance at the specified conditions: phi = 1, mole fractions: [O2] = 0.193723, [CH3CHO] 0.077489], [Ar] = 0.728788
time(ms)	1192 K, 1.45 bar	1214 K, 1.39 bar	1252 K, 1.4 bar	1309 K and 1.36 bar	1366 K and 1.32 bar	1396 K, 1.3 bar
0	0.39402	0.37425	0.34508	0.29789	0.29544	0.27645
0.0004	0.38846	0.37376	0.34054	0.29381	0.29157	0.27328
0.0008	0.38714	0.36629	0.33317	0.28854	0.28788	0.26928
0.0012	0.38387	0.36169	0.33118	0.28329	0.28296	0.26431
0.0016	0.38119	0.36035	0.32748	0.27986	0.27898	0.2616
0.002	0.38054	0.35353	0.32403	0.27326	0.27582	0.25491
0.0024	0.37606	0.35708	0.32317	0.26998	0.27355	0.25335
0.0028	0.37744	0.35309	0.32317	0.268	0.27338	0.2485
0.0032	0.37456	0.35468	0.32052	0.2686	0.26744	0.24745
0.0036	0.37314	0.35456	0.3222	0.2726	0.27058	0.24614
0.004	0.37283	0.35324	0.32317	0.26852	0.2722	0.24753
0.0044	0.37722	0.36027	0.32489	0.27189	0.27177	0.24724
0.0048	0.38113	0.36076	0.32868	0.27409	0.27542	0.25019
0.0052	0.37953	0.3599	0.32937	0.27336	0.27511	0.25516
0.0056	0.37823	0.36161	0.3272	0.27526	0.27403	0.25244
0.006	0.38127	0.35892	0.32893	0.27469	0.27606	0.25244
0.0064	0.38105	0.35889	0.32599	0.27318	0.27639	0.2522
0.0068	0.37946	0.36103	0.32735	0.2765	0.27421	0.25273
0.0072	0.38113	0.3613	0.32502	0.27423	0.27573	0.2509
0.0076	0.3817	0.36209	0.32803	0.27553	0.27632	0.25123
0.008	0.37996	0.3601	0.32684	0.27526	0.27445	0.25011
0.0084	0.38113	0.36303	0.32729	0.27439	0.27292	0.25053
0.0088	0.37722	0.36335	0.325	0.27435	0.27224	0.25067
0.0092	0.37896	0.36083	0.32693	0.27431	0.27136	0.24879
0.0096	0.37757	0.36396	0.32865	0.27495	0.27283	0.25089
0.01	0.38019	0.35853	0.32965	0.27461	0.27541	0.24912
0.0104	0.37831	0.36124	0.32363	0.27534	0.27421	0.24982
0.0108	0.37947	0.36015	0.3303	0.27491	0.2742	0.2485
0.0112	0.37939	0.35974	0.32793	0.27582	0.27137	0.24939
0.0116	0.37665	0.36215	0.32699	0.27581	0.2722	0.24821
0.012	0.37715	0.36089	0.32774	0.27503	0.27146	0.2473
0.0124	0.37708	0.36189	0.32972	0.2746	0.27008	0.24755
0.0128	0.37608	0.36083	0.32609	0.27189	0.27252	0.24583
0.0132	0.3778	0.36318	0.32803	0.274	0.27381	0.24612
0.0136	0.3778	0.36172	0.32965	0.27646	0.27096	0.24654
0.014	0.37904	0.35883	0.32871	0.27495	0.27162	0.24563
0.0144	0.3773	0.36172	0.32967	0.27348	0.27074	0.24579
0.0148	0.37715	0.36074	0.32638	0.27426	0.27131	0.24522
0.0152	0.37831	0.35839	0.32732	0.27487	0.27219	0.24479
0.0156	0.37673	0.36044	0.32732	0.27491	0.27147	0.24424
0.016	0.37953	0.361	0.32926	0.27521	0.2738	0.24424
0.0164	0.38012	0.36188	0.33013	0.27498	0.27065	0.24331
0.0168	0.37911	0.35814	0.32868	0.27378	0.27113	0.24576
0.0172	0.38011	0.35629	0.32845	0.27491	0.27002	0.24159
0.0176	0.37773	0.35968	0.32638	0.27309	0.27122	0.24279
0.018	0.37853	0.35756	0.32855	0.27555	0.26905	0.24125
0.0184	0.37773	0.35797	0.32887	0.27551	0.26905	0.24223
0.0188	0.37859	0.36217	0.32708	0.27521	0.26817	0.24215
0.0192	0.38039	0.36161	0.32693	0.27487	0.26808	0.24317
0.0196	0.38112	0.36038	0.33039	0.27516	0.26912	0.24375
0.02	0.38069	0.36242	0.32793	0.27499	0.26832	0.24257
0.0204	0.37716	0.36068	0.32909	0.27426	0.27018	0.24279
0.0208	0.37765	0.35965	0.32913	0.27659	0.27032	0.24339
0.0212	0.37882	0.359	0.32858	0.27361	0.26985	0.24144
0.0216	0.37889	0.36323	0.32974	0.27366	0.26881	0.2406
0.022	0.37773	0.36136	0.32836	0.27404	0.26591	0.2404
0.0224	0.37882	0.3608	0.32822	0.27279	0.26964	0.24231
0.0228	0.37931	0.36153	0.32897	0.27468	0.26704	0.24082
0.0232	0.37955	0.35924	0.32819	0.27366	0.26914	0.24133
0.0236	0.37781	0.36391	0.32739	0.27313	0.26558	0.24307
0.024	0.37816	0.35908	0.32981	0.27184	0.26617	0.24174
0.0244	0.37773	0.3601	0.32833	0.27245	0.26623	0.24034
0.0248	0.37824	0.36307	0.32793	0.274	0.26622	0.23942
0.0252	0.37751	0.36141	0.32855	0.27301	0.26769	0.23978
0.0256	0.37628	0.36077	0.33085	0.27331	0.26461	0.24163
0.026	0.37716	0.36228	0.32919	0.27249	0.26982	0.2393
0.0264	0.38049	0.36054	0.33075	0.27236	0.26616	0.24014
0.0268	0.37824	0.3598	0.32984	0.27305	0.26783	0.24104
0.0272	0.37905	0.35971	0.32939	0.27373	0.26853	0.23756
0.0276	0.37709	0.36309	0.33013	0.27499	0.263	0.2393
0.028	0.37882	0.36164	0.32974	0.2734	0.26649	0.23919
0.0284	0.37968	0.36138	0.32904	0.27317	0.2686	0.2379
0.0288	0.37881	0.36236	0.3281	0.27253	0.26615	0.2368
0.0292	0.38055	0.36259	0.32833	0.27336	0.26545	0.23616
0.0296	0.37875	0.36435	0.32938	0.27576	0.26552	0.23834
0.03	0.37976	0.36083	0.32959	0.27132	0.26679	0.2377
0.0304	0.37816	0.36083	0.32935	0.27348	0.2664	0.23776
0.0308	0.37824	0.36065	0.32735	0.27348	0.26648	0.23908
0.0312	0.3799	0.36138	0.32778	0.27309	0.26762	0.23675
0.0316	0.37781	0.36477	0.3275	0.27244	0.26649	0.23742
0.032	0.37955	0.36116	0.32799	0.27253	0.2661	0.23554
0.0324	0.37802	0.36074	0.32865	0.27007	0.26537	0.23688
0.0328	0.37628	0.36455	0.32848	0.27494	0.26794	0.23534
0.0332	0.37916	0.36122	0.32959	0.2749	0.26573	0.23467
0.0336	0.37882	0.35977	0.32822	0.27037	0.26232	0.23347
0.034	0.37845	0.36177	0.32764	0.27158	0.26483	0.23293
0.0344	0.37824	0.36083	0.33004	0.27105	0.26943	0.23456
0.0348	0.37773	0.36083	0.32822	0.27158	0.26602	0.23739
0.0352	0.37593	0.36013	0.32788	0.27166	0.26215	0.23411
0.0356	0.37824	0.35956	0.32709	0.27037	0.26224	0.23507
0.036	0.37802	0.36315	0.3266	0.27019	0.26523	0.23507
0.0364	0.3799	0.36343	0.328	0.27286	0.26193	0.23267
0.0368	0.37542	0.3608	0.32965	0.27162	0.26266	0.23106
0.0372	0.37773	0.36279	0.32812	0.26977	0.26329	0.23229
0.0376	0.37708	0.3643	0.32706	0.27041	0.26066	0.23364
0.038	0.37701	0.36315	0.32991	0.26864	0.2649	0.23133
0.0384	0.37557	0.36138	0.32778	0.27041	0.26409	0.23184
0.0388	0.37767	0.36197	0.32987	0.27011	0.26353	0.23149
0.0392	0.37824	0.35974	0.3303	0.26947	0.26194	0.23246
0.0396	0.37593	0.36164	0.32764	0.26943	0.26162	0.23062
0.04	0.37767	0.36318	0.32712	0.2708	0.26349	0.22701
0.0404	0.37708	0.36345	0.32793	0.26963	0.26219	0.22903
0.0408	0.37354	0.36032	0.32929	0.27071	0.26196	0.23178
0.0412	0.37528	0.35968	0.32739	0.27045	0.26404	0.23118
0.0416	0.37536	0.35976	0.32615	0.27128	0.26315	0.23149
0.042	0.3762	0.36138	0.32942	0.27287	0.26009	0.2297
0.0424	0.37925	0.36219	0.32723	0.2708	0.26349	0.22744
0.0428	0.37577	0.36012	0.32822	0.27154	0.25905	0.23002
0.0432	0.37808	0.36206	0.32875	0.27007	0.261	0.22973
0.0436	0.37577	0.36144	0.32655	0.27071	0.26189	0.229
0.044	0.37528	0.36105	0.32694	0.26808	0.26107	0.22706
0.0444	0.37628	0.36071	0.3254	0.26842	0.26004	0.22848
0.0448	0.37558	0.3627	0.32749	0.26977	0.26028	0.22694
0.0452	0.3765	0.36329	0.32764	0.26872	0.26125	0.22553
0.0456	0.37404	0.36371	0.3275	0.27015	0.26116	0.22783
0.046	0.37636	0.36435	0.32554	0.2692	0.26054	0.22861
0.0464	0.37874	0.36295	0.32803	0.26778	0.26213	0.22588
0.0468	0.37808	0.36141	0.3268	0.27106	0.25944	0.22534
0.0472	0.37686	0.36323	0.32684	0.26937	0.26249	0.22528
0.0476	0.37686	0.36023	0.3242	0.26808	0.26047	0.22579
0.048	0.37542	0.3627	0.32697	0.268	0.26118	0.22528
0.0484	0.37628	0.36206	0.32774	0.26692	0.2594	0.22461
0.0488	0.37577	0.36434	0.32798	0.26816	0.25908	0.22681
0.0492	0.37867	0.36265	0.32718	0.26812	0.2558	0.22305
0.0496	0.37592	0.36203	0.32645	0.26744	0.25957	0.22216
0.05	0.37455	0.36377	0.32802	0.26605	0.2568	0.22413
0.0504	0.3762	0.36121	0.32545	0.26652	0.25841	0.22568
0.0508	0.37577	0.36337	0.32648	0.26722	0.25704	0.22525
0.0512	0.37428	0.36396	0.32583	0.26589	0.25872	0.2238
0.0516	0.37577	0.36393	0.32586	0.26335	0.25742	0.22252
0.052	0.37643	0.36082	0.32557	0.26838	0.25783	0.22161
0.0524	0.37635	0.36261	0.32805	0.26576	0.25841	0.22284
0.0528	0.37397	0.3604	0.32676	0.26649	0.25608	0.22284
0.0532	0.37751	0.36197	0.32658	0.26627	0.25734	0.21801
0.0536	0.3752	0.36334	0.32755	0.26714	0.25666	0.22115
0.054	0.37693	0.36337	0.32487	0.26571	0.25739	0.22171
0.0544	0.37635	0.36278	0.32484	0.26365	0.25706	0.22089
0.0548	0.37426	0.36326	0.32564	0.26356	0.25464	0.21965
0.0552	0.37577	0.36069	0.3282	0.26632	0.25773	0.22136
0.0556	0.37759	0.3629	0.32575	0.2658	0.25699	0.21725
0.056	0.377	0.36516	0.32441	0.26537	0.25677	0.21936
0.0564	0.37636	0.36311	0.32409	0.26571	0.25716	0.21818
0.0568	0.3752	0.36528	0.32423	0.26546	0.25659	0.21907
0.0572	0.37534	0.36313	0.32487	0.26636	0.25577	0.21848
0.0576	0.37612	0.36359	0.32539	0.26696	0.25426	0.21765
0.058	0.37497	0.3596	0.32549	0.26541	0.25582	0.21781
0.0584	0.37802	0.36223	0.32564	0.26614	0.25301	0.21875
0.0588	0.37462	0.36281	0.32434	0.26684	0.25587	0.21813
0.0592	0.37555	0.36146	0.32539	0.26455	0.25266	0.21613
0.0596	0.37708	0.36117	0.32513	0.26525	0.25222	0.21637
0.06	0.37528	0.36181	0.32592	0.26576	0.25286	0.21672
0.0604	0.37223	0.36134	0.32542	0.26481	0.25148	0.21703
0.0608	0.37534	0.36441	0.326	0.26619	0.2552	0.21553
0.0612	0.37469	0.36278	0.32177	0.26481	0.25553	0.21432
0.0616	0.37585	0.36307	0.32528	0.26549	0.25149	0.21401
0.062	0.37346	0.3624	0.32332	0.26605	0.25326	0.21474
0.0624	0.37569	0.3634	0.3243	0.26395	0.25429	0.21308
0.0628	0.37802	0.36337	0.32049	0.26529	0.25178	0.21494
0.0632	0.3742	0.36298	0.32242	0.26563	0.25156	0.21399
0.0636	0.37773	0.36413	0.32387	0.26155	0.25244	0.21548
0.064	0.37512	0.36368	0.32235	0.26666	0.25186	0.21375
0.0644	0.37751	0.3644	0.324	0.26365	0.25289	0.21133
0.0648	0.37462	0.36072	0.32552	0.26391	0.24934	0.21248
0.0652	0.37346	0.36274	0.32494	0.26327	0.25048	0.20922
0.0656	0.37469	0.36405	0.32409	0.26425	0.24895	0.20946
0.066	0.37751	0.36297	0.32329	0.2646	0.24875	0.21205
0.0664	0.37542	0.36261	0.32506	0.26584	0.24939	0.21149
0.0668	0.37412	0.36578	0.32484	0.26576	0.24933	0.20896
0.0672	0.37577	0.36578	0.32372	0.26245	0.25119	0.21017
0.0676	0.37685	0.36477	0.32278	0.26451	0.25019	0.20873
0.068	0.37412	0.36612	0.32447	0.26452	0.25146	0.21025
0.0684	0.37389	0.36637	0.32422	0.26434	0.24901	0.20817
0.0688	0.37492	0.36583	0.32264	0.26451	0.24932	0.20963
0.0692	0.37346	0.36205	0.32358	0.26658	0.24994	0.20811
0.0696	0.37643	0.36287	0.32326	0.26455	0.24713	0.20901
0.07	0.37528	0.36536	0.32106	0.26361	0.24994	0.20913
0.0704	0.37446	0.3674	0.32303	0.26447	0.24806	0.20662
0.0708	0.37432	0.3624	0.3253	0.26692	0.24678	0.20851
0.0712	0.37686	0.36617	0.3221	0.26421	0.24841	0.20637
0.0716	0.37743	0.36223	0.32177	0.26464	0.24592	0.20561
0.072	0.37585	0.36676	0.3238	0.26452	0.24599	0.2059
0.0724	0.37497	0.36446	0.32445	0.26399	0.24779	0.20601
0.0728	0.37643	0.36449	0.32278	0.26361	0.24807	0.20553
0.0732	0.37432	0.36178	0.32232	0.26396	0.24898	0.20377
0.0736	0.3765	0.36401	0.32393	0.26035	0.2452	0.20369
0.074	0.37232	0.36469	0.32307	0.26301	0.24356	0.20534
0.0744	0.37397	0.3634	0.32537	0.26288	0.24504	0.20486
0.0748	0.37628	0.36376	0.3239	0.26327	0.24528	0.20497
0.0752	0.37577	0.36337	0.323	0.26357	0.24727	0.20306
0.0756	0.37528	0.3632	0.32501	0.26271	0.24425	0.20245
0.076	0.3755	0.36572	0.32303	0.26189	0.24403	0.20102
0.0764	0.37432	0.36399	0.32238	0.26237	0.24339	0.19935
0.0768	0.37577	0.36401	0.32058	0.26121	0.24302	0.1996
0.0772	0.3752	0.36312	0.32073	0.26305	0.24282	0.19745
0.0776	0.3752	0.36354	0.32232	0.26095	0.24526	0.2001
0.078	0.3752	0.36307	0.32288	0.26271	0.24268	0.19784
0.0784	0.37505	0.3645	0.31813	0.26284	0.24382	0.19883
0.0788	0.37527	0.36172	0.32321	0.26336	0.24251	0.19851
0.0792	0.37462	0.36236	0.32336	0.26082	0.24244	0.19684
0.0796	0.37593	0.36363	0.32051	0.26152	0.24201	0.19829
0.08	0.37693	0.36623	0.32307	0.26121	0.24063	0.19558
0.0804	0.376	0.36337	0.32356	0.2625	0.24008	0.19663
0.0808	0.37643	0.36248	0.32205	0.26069	0.24196	0.19631
0.0812	0.37432	0.36366	0.32022	0.2604	0.24001	0.19689
0.0816	0.37802	0.36477	0.32199	0.26301	0.2428	0.19679
0.082	0.37512	0.36401	0.3221	0.26182	0.23886	0.197
0.0824	0.3752	0.36292	0.32194	0.26224	0.2415	0.19483
0.0828	0.37816	0.36443	0.32109	0.26099	0.24009	0.19262
0.0832	0.37354	0.36511	0.32332	0.26302	0.23987	0.19316
0.0836	0.37759	0.36418	0.32084	0.26091	0.23906	0.19434
0.084	0.37412	0.3641	0.32164	0.26032	0.23964	0.19523
0.0844	0.37585	0.36175	0.32194	0.26099	0.23963	0.19098
0.0848	0.37593	0.36469	0.32128	0.26036	0.23814	0.19083
0.0852	0.37346	0.36298	0.32174	0.26358	0.2397	0.19222
0.0856	0.37759	0.3639	0.32041	0.26211	0.23786	0.19257
0.086	0.37643	0.36301	0.32245	0.26186	0.23794	0.19319
0.0864	0.37412	0.36431	0.3212	0.26138	0.2398	0.19054
0.0868	0.37528	0.36398	0.32066	0.26319	0.2383	0.19041
0.0872	0.37577	0.36485	0.32194	0.2616	0.23806	0.19053
0.0876	0.37601	0.36329	0.32123	0.26092	0.23712	0.18723
0.088	0.37555	0.36586	0.32073	0.2598	0.23785	0.18875
0.0884	0.37556	0.36205	0.32019	0.26215	0.23757	0.18498
0.0888	0.37708	0.36295	0.32242	0.26058	0.2345	0.18965
0.0892	0.37397	0.36528	0.32288	0.26006	0.23664	0.18902
0.0896	0.37636	0.36301	0.32228	0.25852	0.23548	0.18766
0.09	0.37687	0.36422	0.32293	0.26002	0.23375	0.18729
0.0904	0.37642	0.36359	0.32077	0.26075	0.23398	0.18603
0.0908	0.37505	0.36346	0.3199	0.26088	0.23484	0.18555
0.0912	0.37505	0.36304	0.32278	0.25856	0.23441	0.18568
0.0916	0.37686	0.36342	0.32022	0.26057	0.23292	0.18526
0.092	0.37679	0.3641	0.32109	0.25916	0.23357	0.18526
0.0924	0.37628	0.36422	0.3212	0.2583	0.23514	0.18431
0.0928	0.37851	0.36155	0.3212	0.25882	0.23172	0.18806
0.0932	0.37528	0.36508	0.32249	0.25852	0.23414	0.1817
0.0936	0.37701	0.36393	0.32354	0.25833	0.23178	0.18214
0.094	0.37831	0.36181	0.31803	0.25856	0.23233	0.18228
0.0944	0.37311	0.36572	0.3216	0.25763	0.23113	0.18052
0.0948	0.37708	0.36351	0.32167	0.25673	0.23042	0.18275
0.0952	0.37673	0.36443	0.32009	0.25894	0.23178	0.18191
0.0956	0.37716	0.36326	0.32102	0.25723	0.22913	0.17994
0.096	0.37824	0.36388	0.32348	0.25544	0.23184	0.1819
0.0964	0.37708	0.36311	0.32199	0.25706	0.2315	0.18056
0.0968	0.376	0.36275	0.32015	0.25673	0.22954	0.17845
0.0972	0.37571	0.36007	0.32332	0.25972	0.22863	0.18059
0.0976	0.376	0.36491	0.32365	0.25586	0.23048	0.17915
0.098	0.376	0.36349	0.31983	0.25702	0.22922	0.17951
0.0984	0.37542	0.36198	0.32193	0.25694	0.22772	0.17594
0.0988	0.37888	0.36105	0.32077	0.25549	0.22483	0.17495
0.0992	0.37643	0.36178	0.31847	0.25675	0.2268	0.17648
0.0996	0.3765	0.36486	0.31895	0.25788	0.22707	0.17656
0.1	0.37808	0.36028	0.31934	0.25767	0.22586	0.17545
0.1004	0.37563	0.36172	0.32102	0.25725	0.22644	0.17633
0.1008	0.37882	0.36075	0.31899	0.25677	0.22735	0.17368
0.1012	0.37449	0.36169	0.32012	0.25841	0.22614	0.17473
0.1016	0.37469	0.35834	0.32028	0.25702	0.2252	0.17461
0.102	0.37534	0.36146	0.31866	0.25879	0.22364	0.1721
0.1024	0.37369	0.36407	0.31983	0.25677	0.22556	0.16945
0.1028	0.37577	0.36184	0.31901	0.25729	0.22522	0.1715
0.1032	0.37773	0.36236	0.31999	0.25754	0.22579	0.17156
0.1036	0.37657	0.36511	0.32092	0.25592	0.22485	0.17004
0.104	0.37592	0.36049	0.32154	0.25706	0.22443	0.17063
0.1044	0.37635	0.36113	0.31883	0.25313	0.22532	0.16974
0.1048	0.37665	0.3634	0.32034	0.25636	0.22637	0.16898
0.1052	0.37557	0.36119	0.32038	0.25673	0.22467	0.16833
0.1056	0.37751	0.36139	0.32138	0.25665	0.22209	0.17053
0.106	0.37593	0.36007	0.31856	0.25669	0.22181	0.16361
0.1064	0.37549	0.36169	0.31927	0.25532	0.22115	0.16555
0.1068	0.37635	0.36155	0.32182	0.25609	0.22245	0.16436
0.1072	0.37477	0.36016	0.3205	0.25438	0.22108	0.16703
0.1076	0.377	0.36108	0.32092	0.2555	0.22217	0.16501
0.108	0.377	0.36278	0.32082	0.2549	0.22115	0.16415
0.1084	0.37477	0.36304	0.31992	0.2543	0.22098	0.16442
0.1088	0.37492	0.36108	0.31919	0.25696	0.22201	0.16415
0.1092	0.37643	0.36304	0.31912	0.25573	0.22146	0.16339
0.1096	0.37692	0.3613	0.32293	0.25397	0.21997	0.16565
0.11	0.3778	0.35893	0.31979	0.2561	0.21832	0.16479
0.1104	0.37453	0.36273	0.32154	0.25494	0.21959	0.16473
0.1108	0.37569	0.35952	0.32056	0.25314	0.21834	0.1625
0.1112	0.37534	0.36105	0.32068	0.25426	0.21822	0.16446
0.1116	0.37353	0.36214	0.31927	0.25465	0.21864	0.16592
0.112	0.37903	0.36044	0.31872	0.2543	0.21657	0.16151
0.1124	0.37649	0.3615	0.32089	0.2516	0.21906	0.16261
0.1128	0.37441	0.36117	0.32183	0.25376	0.21741	0.16293
0.1132	0.37757	0.35952	0.31975	0.25332	0.21749	0.16202
0.1136	0.37649	0.36265	0.31927	0.25464	0.21711	0.16272
0.114	0.3799	0.36014	0.32021	0.2543	0.21466	0.1632
0.1144	0.37715	0.36011	0.3215	0.2538	0.2164	0.16014
0.1148	0.37888	0.35985	0.32089	0.25187	0.21773	0.16159
0.1152	0.37657	0.35884	0.32183	0.25409	0.215	0.1589
0.1156	0.37388	0.35979	0.31927	0.25401	0.21372	0.15658
0.116	0.37904	0.36091	0.31885	0.25224	0.2154	0.15639
0.1164	0.37541	0.36108	0.32147	0.25191	0.21474	0.156
0.1168	0.37527	0.36044	0.31882	0.2525	0.2165	0.15502
0.1172	0.37715	0.35974	0.31878	0.25117	0.21235	0.15246
0.1176	0.37527	0.36002	0.32137	0.25316	0.213	0.15449
0.118	0.3778	0.36011	0.31901	0.2534	0.21293	0.15444
0.1184	0.37788	0.36028	0.31934	0.25106	0.21153	0.15352
0.1188	0.37672	0.3572	0.32101	0.25405	0.21242	0.15346
0.1192	0.37715	0.36066	0.3192	0.25223	0.21377	0.15102
0.1196	0.37649	0.36205	0.31778	0.25162	0.21374	0.15236
0.12	0.37607	0.35938	0.31611	0.25187	0.21194	0.1494
0.1204	0.37757	0.36002	0.31856	0.25316	0.21357	0.14936
0.1208	0.37715	0.35949	0.31979	0.25105	0.21062	0.14948
0.1212	0.37672	0.35969	0.31915	0.25102	0.21035	0.15017
0.1216	0.37837	0.36019	0.31936	0.25324	0.20961	0.14802
0.122	0.37737	0.35949	0.31889	0.251	0.20904	0.14822
0.1224	0.37468	0.35846	0.31708	0.24896	0.20961	0.14732
0.1228	0.37664	0.35955	0.31972	0.25312	0.20954	0.14696
0.1232	0.37621	0.35932	0.31946	0.25247	0.20711	0.14526
0.1236	0.3778	0.36117	0.31955	0.25017	0.20642	0.14586
0.124	0.37742	0.36049	0.31991	0.24949	0.20764	0.14524
0.1244	0.377	0.35881	0.31862	0.25262	0.20894	0.14579
0.1248	0.37476	0.35873	0.31936	0.24844	0.20985	0.1455
0.1252	0.37656	0.35983	0.31988	0.24984	0.20681	0.14286
0.1256	0.37584	0.35985	0.31736	0.25225	0.20691	0.14368
0.126	0.37722	0.35943	0.31733	0.25073	0.20715	0.144
0.1264	0.37592	0.36163	0.31613	0.2515	0.2069	0.14128
0.1268	0.37707	0.35828	0.31433	0.24739	0.206	0.14231
0.1272	0.37664	0.36075	0.31826	0.25004	0.20625	0.1422
0.1276	0.37426	0.35926	0.31908	0.24775	0.20525	0.14159
0.128	0.37599	0.35882	0.31855	0.24663	0.2046	0.14054
0.1284	0.37484	0.35849	0.31743	0.24815	0.2059	0.14209
0.1288	0.37642	0.35714	0.32014	0.24751	0.20455	0.13959
0.1292	0.37642	0.35779	0.31652	0.24964	0.20643	0.13804
0.1296	0.37649	0.35996	0.31998	0.24804	0.20474	0.13856
0.13	0.37614	0.35837	0.31859	0.24867	0.20379	0.13827
0.1304	0.37599	0.35985	0.32001	0.24719	0.20224	0.13701
0.1308	0.3783	0.35985	0.31952	0.24779	0.20223	0.13614
0.1312	0.37426	0.35761	0.31545	0.24718	0.20166	0.13855
0.1316	0.37664	0.35888	0.31384	0.24937	0.20427	0.13463
0.132	0.3783	0.35955	0.31943	0.24719	0.2041	0.13539
0.1324	0.37368	0.35779	0.31685	0.249	0.20439	0.13506
0.1328	0.37742	0.35873	0.31736	0.24819	0.20156	0.13309
0.1332	0.37764	0.35943	0.31675	0.24747	0.20247	0.13152
0.1336	0.37533	0.35888	0.31749	0.2457	0.20311	0.13214
0.134	0.37591	0.35752	0.31917	0.2476	0.19921	0.1326
0.1344	0.37707	0.35705	0.31794	0.24755	0.20311	0.13456
0.1348	0.37707	0.35717	0.31798	0.24583	0.20186	0.12937
0.1352	0.37787	0.35608	0.3171	0.24823	0.20214	0.13101
0.1356	0.37426	0.35764	0.31672	0.24449	0.19796	0.12944
0.136	0.37606	0.35544	0.31924	0.24433	0.20066	0.13202
0.1364	0.37445	0.36055	0.31633	0.24751	0.2	0.12977
0.1368	0.3728	0.35949	0.31591	0.2467	0.20041	0.12861
0.1372	0.37737	0.35952	0.31829	0.24778	0.19782	0.12834
0.1376	0.37642	0.35832	0.31832	0.24598	0.19891	0.12654
0.138	0.37426	0.35776	0.31865	0.24582	0.19968	0.12617
0.1384	0.37642	0.35832	0.31517	0.24397	0.19681	0.12591
0.1388	0.37438	0.35835	0.31855	0.2463	0.20021	0.12582
0.1392	0.37656	0.3577	0.31761	0.24425	0.19852	0.12403
0.1396	0.37576	0.35553	0.31701	0.24574	0.20059	0.12409
0.14	0.37368	0.35803	0.31588	0.24602	0.19608	0.12264
0.1404	0.37518	0.35756	0.31736	0.2459	0.19674	0.12333
0.1408	0.37491	0.35814	0.31514	0.24462	0.19739	0.12227
0.1412	0.37426	0.3572	0.31891	0.24578	0.19917	0.12224
0.1416	0.3736	0.35955	0.31601	0.2461	0.19909	0.11792
0.142	0.37541	0.35743	0.31749	0.24679	0.19706	0.12055
0.1424	0.37518	0.35875	0.31729	0.24517	0.19893	0.11998
0.1428	0.37403	0.3614	0.31629	0.24393	0.19436	0.11786
0.1432	0.37642	0.3577	0.31462	0.24401	0.19754	0.11893
0.1436	0.37368	0.35806	0.31769	0.24702	0.19736	0.11674
0.144	0.37433	0.35723	0.31591	0.24445	0.19518	0.11656
0.1444	0.37396	0.35612	0.31817	0.24485	0.19622	0.11648
0.1448	0.37518	0.35958	0.31404	0.24457	0.19712	0.11153
0.1452	0.37764	0.35779	0.31672	0.24216	0.19315	0.11402
0.1456	0.37684	0.35888	0.31581	0.24309	0.19524	0.11418
0.146	0.37383	0.35975	0.31727	0.2422	0.19428	0.11282
0.1464	0.37476	0.35708	0.31639	0.24321	0.19437	0.11462
0.1468	0.37491	0.35773	0.31682	0.24252	0.19428	0.11022
0.1472	0.37664	0.35635	0.31591	0.24438	0.19394	0.1098
0.1476	0.37468	0.35941	0.31817	0.24381	0.19264	0.1081
0.148	0.37642	0.35641	0.31537	0.24131	0.19192	0.1076
0.1484	0.37303	0.35688	0.31537	0.24173	0.192	0.10822
0.1488	0.37345	0.35653	0.31537	0.24252	0.19013	0.10723
0.1492	0.37252	0.35728	0.31572	0.24188	0.19011	0.10856
0.1496	0.3723	0.35623	0.31684	0.24377	0.19134	0.1083
0.15	0.37311	0.35729	0.3155	0.24469	0.19102	0.10583
0.1504	0.37518	0.35899	0.31482	0.24245	0.18965	0.10557
0.1508	0.3736	0.35799	0.31656	0.24381	0.1894	0.10424
0.1512	0.37692	0.357	0.31681	0.24345	0.18988	0.10346
0.1516	0.37325	0.3548	0.31518	0.24297	0.18891	0.10462
0.152	0.37384	0.35509	0.31653	0.24256	0.18721	0.10178
0.1524	0.3728	0.35882	0.31588	0.24284	0.18989	0.10052
0.1528	0.37353	0.35521	0.31636	0.2426	0.18802	0.10192
0.1532	0.37433	0.35823	0.3181	0.2396	0.18777	0.09943
0.1536	0.37304	0.35949	0.31639	0.24321	0.18681	0.09999
0.154	0.37564	0.35832	0.31692	0.24305	0.1881	0.09865
0.1544	0.37245	0.35712	0.31752	0.24016	0.18721	0.09919
0.1548	0.37187	0.35776	0.31492	0.24108	0.18803	0.09919
0.1552	0.37548	0.35697	0.31636	0.23963	0.18439	0.10085
0.1556	0.37333	0.35832	0.31372	0.24024	0.18624	0.09714
0.156	0.37245	0.35606	0.31318	0.24052	0.185	0.09297
0.1564	0.37237	0.35726	0.31737	0.24176	0.18624	0.09845
0.1568	0.37157	0.35908	0.3151	0.24241	0.18542
0.1572	0.37376	0.35735	0.31488	0.23908	0.18455
0.1576	0.37114	0.35565	0.31714	0.2414	0.18414
0.158	0.3726	0.35453	0.31594	0.24048	0.18519
0.1584	0.3718	0.35603	0.31604	0.24116	0.18366
0.1588	0.37391	0.36137	0.31717	0.23912	0.18292
0.1592	0.3731	0.35708	0.31688	0.23895	0.18546
0.1596	0.37318	0.35708	0.3154	0.2406	0.18292
0.16	0.37418	0.35905	0.31505	0.24052	0.1848
0.1604	0.37542	0.35808	0.31872	0.23819	0.18139
0.1608	0.3726	0.35518	0.31694	0.23992	0.18083
0.1612	0.37426	0.35438	0.31636	0.23987	0.18366
0.1616	0.37103	0.36005	0.31411	0.24092	0.18058
0.162	0.37441	0.35726	0.31485	0.24116	0.18356
0.1624	0.3726	0.35844	0.31444	0.23912	0.18011
0.1628	0.37295	0.35665	0.31495	0.23848	0.18244
0.1632	0.37426	0.35861	0.31646	0.23839	0.18219
0.1636	0.37188	0.35828	0.3153	0.2394	0.18036
0.164	0.37361	0.35608	0.31482	0.23727	0.17923
0.1644	0.37433	0.35679	0.31417	0.2376	0.1794
0.1648	0.37369	0.35781	0.31563	0.23872	0.18126
0.1652	0.37433	0.35441	0.31566	0.23736	0.17939
0.1656	0.37088	0.35629	0.31686	0.23916	0.17706
0.166	0.37295	0.35655	0.31689	0.23815	0.17915
0.1664	0.37541	0.35703	0.31502	0.23776	0.17891
0.1668	0.3708	0.35324	0.3172	0.2394	0.17901
0.1672	0.37237	0.35673	0.31639	0.23876	0.1789
0.1676	0.37426	0.35662	0.31708	0.23607	0.17788
0.168	0.37311	0.3572	0.31788	0.23524	0.17803
0.1684	0.37418	0.35533	0.31553	0.23852	0.17843
0.1688	0.37015	0.35641	0.31383	0.23844	0.17797
0.1692	0.37015	0.35717	0.31563	0.23539	0.17652
0.1696	0.37392	0.35719	0.31492	0.2384	0.17344
0.17	0.37238	0.35665	0.31222	0.23816	0.17788
0.1704	0.37276	0.356	0.31594	0.23511	0.17749
0.1708	0.37245	0.35562	0.31502	0.23648	0.17788
0.1712	0.37361	0.35916	0.31447	0.23524	0.17322
0.1716	0.37384	0.35685	0.31618	0.23561	0.17387
0.172	0.37361	0.35785	0.31672	0.23807	0.1731
0.1724	0.37237	0.35788	0.31385	0.23394	0.17228
0.1728	0.37361	0.35626	0.31591	0.23784	0.17605
0.1732	0.37103	0.35685	0.31833	0.2358	0.17258
0.1736	0.37103	0.35793	0.31457	0.23765	0.17133
0.174	0.37384	0.35946	0.31737	0.23548	0.17124
0.1744	0.37334	0.35788	0.31563	0.23381	0.17224
0.1748	0.37218	0.35992	0.31569	0.23672	0.1715
0.1752	0.37299	0.3579	0.31485	0.23492	0.17101
0.1756	0.37392	0.35752	0.3155	0.23844	0.17079
0.176	0.37384	0.36017	0.31545	0.23473	0.16888
0.1764	0.37384	0.35706	0.31422	0.23561	0.1693
0.1768	0.37369	0.35723	0.31372	0.23489	0.16905
0.1772	0.37369	0.3587	0.31805	0.23372	0.16889
0.1776	0.37238	0.3626	0.31627	0.23553	0.16657
0.178	0.37211	0.35769	0.31717	0.23489	0.16615
0.1784	0.37261	0.35847	0.31569	0.23377	0.16715
0.1788	0.37384	0.35875	0.31354	0.23504	0.16796
0.1792	0.37384	0.35708	0.31563	0.23621	0.16734
0.1796	0.37246	0.35556	0.3136	0.23308	0.16587
0.18	0.37319	0.35726	0.31563	0.2352	0.16547
0.1804	0.37456	0.35743	0.31608	0.23428	0.16568
0.1808	0.37477	0.35752	0.31717	0.23229	0.16476
0.1812	0.37153	0.35755	0.31292	0.23789	0.16533
0.1816	0.37392	0.35641	0.31299	0.2346	0.16381
0.182	0.37196	0.35849	0.31675	0.2352	0.1659
0.1824	0.37392	0.35755	0.31556	0.23552	0.16425
0.1828	0.37384	0.35743	0.31669	0.2347	0.16185
0.1832	0.37392	0.35732	0.31682	0.23376	0.16301
0.1836	0.37507	0.35931	0.31541	0.2352	0.16424
0.184	0.3713	0.35916	0.3146	0.23374	0.16241
0.1844	0.37196	0.35942	0.314	0.2332	0.16069
0.1848	0.37096	0.3582	0.31483	0.23386	0.16265
0.1852	0.37218	0.35881	0.31521	0.23433	0.16286
0.1856	0.37246	0.35819	0.31336	0.23349	0.16134
0.186	0.37073	0.35793	0.31502	0.23493	0.16128
0.1864	0.37196	0.35913	0.31203	0.23381	0.15948
0.1868	0.37145	0.35886	0.31846	0.23241	0.16077
0.1872	0.37384	0.35749	0.31453	0.23291	0.16026
0.1876	0.37384	0.35746	0.31322	0.23106	0.15881
0.188	0.37246	0.35766	0.31496	0.23257	0.15796
0.1884	0.37361	0.35788	0.31357	0.23233	0.15704
0.1888	0.37246	0.35711	0.31589	0.23389	0.15488
0.1892	0.37203	0.35702	0.31579	0.23306	0.15559
0.1896	0.37296	0.36048	0.31514	0.23197	0.15796
0.19	0.37161	0.35967	0.31272	0.23174	0.15796
0.1904	0.37312	0.35746	0.31203	0.23154	0.15645
0.1908	0.37238	0.35761	0.3146	0.23045	0.15352
0.1912	0.37204	0.35851	0.31637	0.23318	0.1553
0.1916	0.37111	0.35939	0.31357	0.23056	0.15286
0.192	0.37204	0.35875	0.31303	0.2326	0.15308
0.1924	0.37311	0.35743	0.31374	0.23114	0.15394
0.1928	0.37326	0.3604	0.31367	0.23135	0.15251
0.1932	0.37326	0.3599	0.31286	0.23218	0.15246
0.1936	0.37261	0.35942	0.31322	0.23106	0.15122
0.194	0.37116	0.36213	0.31428	0.23098	0.15216
0.1944	0.37254	0.36104	0.31142	0.23164	0.15138
0.1948	0.37138	0.36033	0.31241	0.23135	0.15137
0.1952	0.37031	0.35942	0.31463	0.23106	0.14759
0.1956	0.37096	0.35649	0.31486	0.23191	0.15073
0.196	0.37246	0.35811	0.31261	0.22954	0.14896
0.1964	0.37304	0.35858	0.31203	0.22871	0.15139
0.1968	0.37169	0.35934	0.31518	0.22961	0.14938
0.1972	0.37326	0.35931	0.31251	0.22931	0.14925
0.1976	0.37392	0.35705	0.3145	0.2316	0.15002
0.198	0.37261	0.35808	0.31299	0.23041	0.1479
0.1984	0.37565	0.35808	0.31415	0.22931	0.14616
0.1988	0.37354	0.35981	0.31324	0.23172	0.14747
0.1992	0.37204	0.35749	0.31097	0.22927	0.14605
0.1996	0.37385	0.35934	0.31445	0.22992	0.14646
0.2	0.3732	0.35957	0.31486	0.22844	0.14846
0.2004	0.37334	0.35813	0.31548	0.23135	0.14431
0.2008	0.3713	0.35875	0.31402	0.23108	0.14854
0.2012	0.37053	0.35828	0.31493	0.23025	0.14513
0.2016	0.37442	0.35781	0.31528	0.22753	0.14368
0.202	0.37334	0.3596	0.31415	0.23008	0.14369
0.2024	0.37434	0.35875	0.31415	0.22873	0.1447
0.2028	0.37326	0.35939	0.3138	0.23025	0.14204
0.2032	0.37361	0.35685	0.31261	0.23108	0.14336
0.2036	0.37549	0.35834	0.31359	0.22813	0.14143
0.204	0.37334	0.36024	0.31296	0.22744	0.14051
0.2044	0.37442	0.35785	0.31278	0.22869	0.14094
0.2048	0.37334	0.35666	0.31268	0.22561	0.13972
0.2052	0.37269	0.35766	0.31479	0.22635	0.13802
0.2056	0.37434	0.3581	0.3136	0.22782	0.1415
0.206	0.37104	0.35728	0.31243	0.22756	0.13988
0.2064	0.37334	0.35813	0.31357	0.22877	0.13931
0.2068	0.37253	0.35769	0.31367	0.22934	0.13868
0.2072	0.37311	0.35702	0.31206	0.22847	0.13783
0.2076	0.37192	0.35693	0.31216	0.2282	0.13615
0.208	0.37246	0.35626	0.31489	0.22925	0.13884
0.2084	0.37073	0.35942	0.31087	0.22662	0.13763
0.2088	0.37369	0.35616	0.31056	0.22747	0.13418
0.2092	0.37318	0.35752	0.31322	0.22635	0.13446
0.2096	0.37104	0.35834	0.31503	0.22851	0.1349
0.21	0.3745	0.35611	0.31278	0.22967	0.13517
0.2104	0.37218	0.35515	0.31216	0.22858	0.13315
0.2108	0.37426	0.35872	0.31111	0.22851	0.13285
0.2112	0.37261	0.3557	0.31131	0.22687	0.13484
0.2116	0.37507	0.35825	0.31275	0.22722	0.13046
0.212	0.37384	0.35878	0.31275	0.22782	0.13032
0.2124	0.37311	0.35652	0.31206	0.22665	0.13211
0.2128	0.37145	0.35837	0.31149	0.22608	0.12969
0.2132	0.37038	0.35983	0.31349	0.2248	0.12857
0.2136	0.37406	0.35711	0.31059	0.22544	0.1255
0.214	0.37326	0.35547	0.3122	0.22793	0.1309
0.2144	0.37557	0.35752	0.31213	0.22582	0.12736
0.2148	0.37318	0.3564	0.31278	0.22499	0.12624
0.2152	0.37241	0.35884	0.31062	0.22906	0.12589
0.2156	0.37392	0.35734	0.31069	0.22427	0.12396
0.216	0.37334	0.35593	0.3143	0.22548	0.12417
0.2164	0.37261	0.3559	0.31213	0.22556	0.1241
0.2168	0.37153	0.35547	0.31213	0.22604	0.12313
0.2172	0.37349	0.35713	0.31107	0.22781	0.12309
0.2176	0.37449	0.35585	0.31089	0.22651	0.11939
0.218	0.37211	0.35813	0.31165	0.22763	0.12136
0.2184	0.37031	0.35593	0.31134	0.22563	0.12099
0.2188	0.37276	0.35652	0.31397	0.2257	0.11701
0.2192	0.3698	0.35851	0.31114	0.22543	0.11848
0.2196	0.37333	0.35523	0.31243	0.22646	0.11822
0.22	0.37465	0.3542	0.31212	0.22645	0.11746
0.2204	0.37211	0.35532	0.31107	0.22457	0.11331
0.2208	0.37557	0.35626	0.31213	0.22431	0.1146
0.2212	0.37514	0.35502	0.31152	0.2253	0.11517
0.2216	0.37096	0.35585	0.31086	0.22551	0.11559
0.222	0.37333	0.35529	0.31278	0.22589	0.11001
0.2224	0.37038	0.35538	0.31257	0.22435
0.2228	0.37376	0.35593	0.31066	0.22581
0.2232	0.37276	0.3547	0.30906	0.22645
0.2236	0.37234	0.35611	0.31213	0.22296
0.224	0.37284	0.35805	0.31253	0.2269
0.2244	0.37657	0.3552	0.31072	0.2262
0.2248	0.37356	0.35488	0.3123	0.22404
0.2252	0.37326	0.35649	0.31099	0.22348
0.2256	0.37456	0.35535	0.31168	0.22417
0.226	0.37341	0.35412	0.31127	0.22585
0.2264	0.37095	0.35585	0.31124	0.22382
0.2268	0.37291	0.3559	0.31117	0.22615
0.2272	0.37433	0.35441	0.31288	0.22555
0.2276	0.37249	0.35462	0.3099	0.22288
0.228	0.37572	0.35599	0.30916	0.22296
0.2284	0.37137	0.3542	0.30895	0.22141
0.2288	0.37449	0.35531	0.30824	0.22304
0.2292	0.37176	0.35391	0.31226	0.22382
0.2296	0.37226	0.35462	0.30871	0.22469
0.23	0.37341	0.35403	0.30909	0.22292
0.2304	0.37464	0.35485	0.31045	0.22326
0.2308	0.37226	0.35424	0.30937	0.22487
0.2312	0.37406	0.35497	0.3097	0.22671
0.2316	0.37341	0.35547	0.31066	0.22338
0.232	0.37183	0.35297	0.31017	0.2236
0.2324	0.37456	0.35462	0.31144	0.223
0.2328	0.37226	0.3528	0.31069	0.22292
0.2332	0.37506	0.35605	0.31069	0.22326
0.2336	0.37276	0.35435	0.31185	0.22412
0.234	0.37464	0.35464	0.31158	0.2236
0.2344	0.37552	0.35503	0.30936	0.22394
0.2348	0.37176	0.35464	0.3078	0.22404
0.2352	0.37414	0.3523	0.3097	0.22227
0.2356	0.37249	0.35259	0.30926	0.22364
0.236	0.37306	0.3542	0.30762	0.22145
0.2364	0.37529	0.35514	0.3081	0.22364
0.2368	0.37487	0.35406	0.30599	0.22292
0.2372	0.37291	0.354	0.3082	0.22314
0.2376	0.37544	0.35462	0.30616	0.2221
0.238	0.37471	0.35286	0.3082	0.22429
0.2384	0.37456	0.35347	0.30888	0.22288
0.2388	0.37456	0.35321	0.30517	0.2224
0.2392	0.37594	0.35362	0.30633	0.22334
0.2396	0.37126	0.35347	0.30769	0.22085
0.24	0.37514	0.35339	0.30695	0.22236
0.2404	0.37599	0.35719	0.30752	0.22098
0.2408	0.37414	0.35209	0.30705	0.21887
0.2412	0.37486	0.35335	0.30592	0.2224
0.2416	0.37234	0.35218	0.30609	0.22089
0.242	0.37329	0.35245	0.30977	0.2233
0.2424	0.37218	0.35353	0.30728	0.22153
0.2428	0.37529	0.35517	0.30391	0.22037
0.2432	0.37226	0.35371	0.30667	0.22244
0.2436	0.37414	0.35403	0.30592	0.22222
0.244	0.37387	0.3545	0.30851	0.22158
0.2444	0.37318	0.35297	0.30323	0.22192
0.2448	0.37348	0.35335	0.30913	0.21891
0.2452	0.37226	0.35297	0.30517	0.22409
0.2456	0.37391	0.35248	0.3066	0.22102
0.246	0.37241	0.35429	0.3066	0.21981
0.2464	0.37291	0.35508	0.3048	0.22256
0.2468	0.37102	0.35183	0.30579	0.223
0.2472	0.37456	0.35415	0.30524	0.21999
0.2476	0.37629	0.35362	0.30534	0.21951
0.248	0.37514	0.35268	0.30688	0.22166
0.2484	0.37414	0.35037	0.30435	0.21878
0.2488	0.37414	0.3535	0.30425	0.21899
0.2492	0.37456	0.35341	0.30408	0.2169
0.2496	0.37414	0.35159	0.30881	0.21934
0.25	0.37521	0.35242	0.30398	0.22102
0.2504	0.37506	0.35391	0.30555	0.21874
0.2508	0.37233	0.35239	0.30269	0.2199
0.2512	0.37152	0.35344	0.305	0.22003
0.2516	0.3716	0.35514	0.30337	0.21938
0.252	0.37521	0.35268	0.30361	0.21843
0.2524	0.3711	0.35095	0.30626	0.2175
0.2528	0.37514	0.34993	0.30272	0.21779
0.2532	0.37429	0.35209	0.30374	0.21893
0.2536	0.37341	0.35257	0.30354	0.2184
0.254	0.37348	0.35054	0.30565	0.2196
0.2544	0.37268	0.35116	0.30527	0.21845
0.2548	0.37348	0.35113	0.30238	0.21629
0.2552	0.37521	0.35417	0.3019	0.21832
0.2556	0.37126	0.35057	0.30136	0.21982
0.256	0.37391	0.35118	0.30337	0.21844
0.2564	0.37103	0.35011	0.30228	0.22051
0.2568	0.37268	0.35078	0.30218	0.21676
0.2572	0.37414	0.35008	0.30112	0.2196
0.2576	0.3716	0.35107	0.30337	0.21582
0.258	0.37399	0.35265	0.30275	0.2147
0.2584	0.3716	0.35183	0.30401	0.21797
0.2588	0.37306	0.35069	0.30275	0.21685
0.2592	0.37133	0.35127	0.30218	0.21372
0.2596	0.37414	0.35063	0.30408	0.21419
0.26	0.37406	0.35057	0.30241	0.21441
0.2604	0.3703	0.34841	0.30245	0.21647
0.2608	0.37422	0.34993	0.30275	0.21411
0.2612	0.37291	0.35248	0.30058	0.21613
0.2616	0.37241	0.35011	0.30211	0.21849
0.262	0.37168	0.3504	0.30361	0.2154
0.2624	0.37283	0.35291	0.30028	0.21711
0.2628	0.37168	0.34954	0.3016	0.2132
0.2632	0.37233	0.35157	0.30228	0.21728
0.2636	0.36896	0.3499	0.30143	0.21287
0.264	0.37241	0.34771	0.30334	0.21437
0.2644	0.37176	0.34829	0.30204	0.21759
0.2648	0.37011	0.35118	0.30167	0.21532
0.2652	0.37045	0.34829	0.30115	0.21365
0.2656	0.37068	0.34979	0.30058	0.21561
0.266	0.3716	0.34773	0.30238	0.21291
0.2664	0.37038	0.35019	0.29977	0.21382
0.2668	0.37241	0.35122	0.30014	0.2142
0.2672	0.37068	0.35131	0.30085	0.21305
0.2676	0.37118	0.35016	0.30038	0.21553
0.268	0.37168	0.34891	0.30504	0.21303
0.2684	0.37018	0.34785	0.30126	0.21266
0.2688	0.37176	0.34917	0.30051	0.21398
0.2692	0.37037	0.35113	0.3013	0.21201
0.2696	0.37218	0.35159	0.30112	0.21266
0.27	0.37348	0.34823	0.30078	0.21145
0.2704	0.37111	0.35198	0.30317	0.21185
0.2708	0.3703	0.35162	0.30109	0.21043
0.2712	0.37256	0.34967	0.30133	0.21237
0.2716	0.37206	0.35093	0.30082	0.21297
0.272	0.37018	0.35116	0.30085	0.21365
0.2724	0.37333	0.34826	0.30313	0.21241
0.2728	0.37183	0.35131	0.30075	0.21066
0.2732	0.3693	0.34914	0.29915	0.21116
0.2736	0.37084	0.35081	0.29966	0.20889
0.274	0.37141	0.35192	0.30201	0.21018
0.2744	0.37226	0.34943	0.29789	0.21072
0.2748	0.37152	0.34715	0.30137	0.20921
0.2752	0.36895	0.34642	0.29952	0.21087
0.2756	0.36895	0.35239	0.3032	0.21038
0.276	0.3711	0.34736	0.3015	0.21035
0.2764	0.37168	0.35075	0.30191	0.21006
0.2768	0.36796	0.35081	0.29973	0.20937
0.2772	0.37034	0.34853	0.30058	0.2107
0.2776	0.37003	0.34721	0.30021	0.209
0.278	0.37226	0.34993	0.30256	0.21074
0.2784	0.37226	0.35412	0.29959	0.20873
0.2788	0.36872	0.3492	0.30068	0.20879
0.2792	0.37314	0.35011	0.30038	0.2086
0.2796	0.37149	0.35016	0.30021	0.20638
0.28	0.3688	0.34999	0.30106	0.20908
0.2804	0.3716	0.35221	0.30248	0.20788
0.2808	0.37061	0.34946	0.29817	0.20699
0.2812	0.37053	0.34905	0.29959	0.20723
0.2816	0.36765	0.34911	0.30354	0.20815
0.282	0.37018	0.34782	0.30051	0.20618
0.2824	0.37011	0.34904	0.30106	0.20686
0.2828	0.37045	0.35248	0.30069	0.20815
0.2832	0.36888	0.348	0.3013	0.20545
0.2836	0.37126	0.35016	0.30137	0.20819
0.284	0.37061	0.3492	0.2999	0.20755
0.2844	0.37126	0.34973	0.30106	0.20674
0.2848	0.37018	0.34896	0.29915	0.2073
0.2852	0.37076	0.34779	0.30127	0.20614
0.2856	0.36953	0.3518	0.29943	0.2073
0.286	0.37003	0.34817	0.29824	0.20638
0.2864	0.37133	0.35034	0.30147	0.20599
0.2868	0.37003	0.35072	0.29925	0.2061
0.2872	0.37341	0.35057	0.29988	0.20553
0.2876	0.37076	0.35139	0.29933	0.20645
0.288	0.37011	0.35069	0.29998	0.20558
0.2884	0.37118	0.35063	0.29701	0.20219
0.2888	0.36995	0.35174	0.30048	0.20633
0.2892	0.36987	0.3497	0.2994	0.20464
0.2896	0.36995	0.34894	0.30062	0.20681
0.29	0.37168	0.35028	0.29917	0.20408
0.2904	0.37283	0.35239	0.29872	0.20516
0.2908	0.37283	0.35526	0.29953	0.20323
0.2912	0.37183	0.34993	0.29977	0.20516
0.2916	0.37141	0.35174	0.29716	0.2021
0.292	0.37218	0.35174	0.30208	0.2044
0.2924	0.37348	0.34973	0.29824	0.20243
0.2928	0.37291	0.35043	0.29719	0.20391
0.2932	0.37191	0.34955	0.29933	0.20319
0.2936	0.37176	0.3523	0.29892	0.2044
0.294	0.37176	0.34961	0.29889	0.20098
0.2944	0.37314	0.34884	0.29867	0.20127
0.2948	0.3721	0.35066	0.30025	0.20214
0.2952	0.37145	0.35084	0.29799	0.20122
0.2956	0.37076	0.3506	0.30027	0.20214
0.296	0.37283	0.34999	0.30035	0.20283
0.2964	0.37464	0.35359	0.29987	0.20089
0.2968	0.37152	0.35163	0.29882	0.20106
0.2972	0.37291	0.34879	0.30012	0.20005
0.2976	0.37076	0.35432	0.2995	0.20014
0.298	0.37226	0.35113	0.29995	0.20194
0.2984	0.37479	0.35098	0.29988	0.20022
0.2988	0.37145	0.35043	0.29879	0.19897
0.2992	0.3711	0.35327	0.2982	0.19856
0.2996	0.37249	0.35362	0.29864	0.19961
0.3	0.37176	0.35429	0.29971	0.20254
0.3004	0.37283	0.35301	0.29848	0.20142
0.3008	0.3716	0.3521	0.30124	0.20025
0.3012	0.36995	0.35005	0.29889	0.19929
0.3016	0.3706	0.35192	0.29842	0.20138
0.302	0.37306	0.35497	0.29882	0.19768
0.3024	0.37306	0.35186	0.29719	0.20178
0.3028	0.36987	0.35374	0.29943	0.2015
0.3032	0.37356	0.35377	0.29682	0.1984
0.3036	0.37348	0.35297	0.29971	0.19921
0.304	0.37275	0.35386	0.30001	0.20001
0.3044	0.37141	0.35186	0.29726	0.19844
0.3048	0.3706	0.35491	0.29822	0.19925
0.3052	0.37275	0.35482	0.29777	0.19652
0.3056	0.37291	0.35236	0.2991	0.19853
0.306	0.37448	0.35283	0.29757	0.19716
0.3064	0.37506	0.35224	0.29661	0.19945
0.3068	0.37275	0.35195	0.30025	0.19652
0.3072	0.37406	0.35154	0.29923	0.19652
0.3076	0.37126	0.35245	0.29943	0.19516
0.308	0.37348	0.35099	0.29906	0.1982
0.3084	0.37218	0.35397	0.29642	0.19596
0.3088	0.37406	0.35309	0.29773	0.19684
0.3092	0.37283	0.35063	0.29983	0.19617
0.3096	0.37241	0.35186	0.29927	0.1948
0.31	0.37268	0.35359	0.2978	0.19516
0.3104	0.37068	0.35014	0.29784	0.1946
0.3108	0.3721	0.35174	0.29801	0.1952
0.3112	0.37011	0.3514	0.2977	0.19279
0.3116	0.37298	0.35265	0.29974	0.19533
0.312	0.37168	0.35011	0.29825	0.1958
0.3124	0.37414	0.35146	0.30025	0.19488
0.3128	0.37045	0.35245	0.29879	0.19432
0.3132	0.37199	0.35076	0.29737	0.19324
0.3136	0.3716	0.35254	0.2979	0.19292
0.314	0.37068	0.35292	0.29682	0.19066
0.3144	0.37018	0.35204	0.30059	0.19324
0.3148	0.3698	0.35254	0.29848	0.19316
0.3152	0.36938	0.35245	0.29668	0.19344
0.3156	0.37199	0.35044	0.29685	0.19279
0.316	0.37348	0.35272	0.29961	0.19236
0.3164	0.37268	0.35327	0.2974	0.19191
0.3168	0.37176	0.35254	0.29856	0.1938
0.3172	0.37241	0.35161	0.29911	0.19159
0.3176	0.37126	0.35175	0.29801	0.19124
0.318	0.37233	0.35272	0.29725	0.19192
0.3184	0.37225	0.34961	0.29682	0.19172
0.3188	0.37118	0.35286	0.2977	0.19368
0.3192	0.37037	0.35309	0.30185	0.19184
0.3196	0.37283	0.35199	0.29784	0.19152
0.32	0.36757	0.35137	0.29632	0.19216
0.3204	0.36872	0.35014	0.29639	0.19073
0.3208	0.37003	0.35266	0.29672	0.19185
0.3212	0.37045	0.34966	0.29905	0.18901
0.3216	0.3693	0.35327	0.29665	0.19156
0.322	0.37068	0.35072	0.29798	0.18925
0.3224	0.37275	0.34906	0.29795	0.18892
0.3228	0.37003	0.35146	0.2949	0.19121
0.3232	0.37052	0.35105	0.29879	0.1886
0.3236	0.36846	0.35087	0.29825	0.18837
0.324	0.37168	0.35049	0.29755	0.18729
0.3244	0.36938	0.34936	0.29856	0.18756
0.3248	0.3683	0.3557	0.29668	0.19049
0.3252	0.37326	0.35099	0.29945	0.18851
0.3256	0.36888	0.34985	0.29479	0.18957
0.326	0.37045	0.34905	0.29891	0.18633
0.3264	0.37118	0.3509	0.2969	0.18789
0.3268	0.37037	0.35149	0.29914	0.18837
0.3272	0.36995	0.34939	0.29733	0.18709
0.3276	0.37003	0.34997	0.29791	0.18841
0.328	0.36773	0.34936	0.29869	0.18521
0.3284	0.36872	0.35204	0.29758	0.18653
0.3288	0.36903	0.35222	0.29683	0.18776
0.3292	0.36938	0.35175	0.30084	0.18462
0.3296	0.36815	0.35265	0.29624	0.18753
0.33	0.36823	0.35016	0.2971	0.18739
0.3304	0.36872	0.34976	0.29683	0.18562
0.3308	0.36872	0.3514	0.29693	0.18739
0.3312	0.37045	0.35041	0.29791	0.18512
0.3316	0.37168	0.35049	0.29877	0.18587
0.332	0.36577	0.3505	0.29877	0.1867
0.3324	0.37002	0.35099	0.29871	0.18512
0.3328	0.37218	0.35185	0.2969	0.18591
0.3332	0.36945	0.35018	0.29816	0.18414
0.3336	0.36838	0.35231	0.29527	0.18503
0.334	0.36616	0.34831	0.29732	0.18599
0.3344	0.36914	0.35053	0.29809	0.18493
0.3348	0.36888	0.35078	0.29545	0.18512
0.3352	0.36807	0.35204	0.29643	0.18576
0.3356	0.36788	0.35181	0.29935	0.18428
0.336	0.36846	0.34944	0.29688	0.18327
0.3364	0.36823	0.3514	0.29471	0.18293
0.3368	0.37011	0.34991	0.29748	0.18364
0.3372	0.36961	0.34761	0.29552	0.18341
0.3376	0.3683	0.3493	0.29671	0.18455
0.338	0.36911	0.34981	0.29917	0.18512
0.3384	0.366	0.34825	0.29865	0.18224
0.3388	0.36895	0.35027	0.29816	0.18281
0.3392	0.36937	0.35225	0.29758	0.18326
0.3396	0.3688	0.3517	0.29812	0.18322
0.34	0.36945	0.35076	0.29728	0.18355
0.3404	0.36527	0.34653	0.2962	0.18285
0.3408	0.3683	0.34717	0.2965	0.18138
0.3412	0.36642	0.35185	0.29526	0.18435
0.3416	0.36634	0.34799	0.29769	0.18206
0.342	0.3678	0.35249	0.29905	0.18426
0.3424	0.36707	0.34884	0.29895	0.18262
0.3428	0.36699	0.35149	0.29786	0.18457
0.3432	0.36642	0.35523	0.29881	0.18175
0.3436	0.36715	0.35255	0.29715	0.18179
0.344	0.36865	0.3493	0.29857	0.18345
0.3444	0.3665	0.35106	0.29746	0.17986
0.3448	0.36699	0.35126	0.29678	0.18171
0.3452	0.36807	0.3512	0.29718	0.18152
0.3456	0.36731	0.3517	0.29831	0.17956
0.346	0.3693	0.35107	0.29801	0.17768
0.3464	0.36815	0.35135	0.29895	0.18002
0.3468	0.36773	0.35053	0.29645	0.17918
0.3472	0.36634	0.35357	0.29577	0.17888
0.3476	0.3678	0.35021	0.30014	0.17671
0.348	0.3678	0.35016	0.2981	0.17982
0.3484	0.36626	0.35244	0.29483	0.17607
0.3488	0.36872	0.35225	0.29831	0.17866
0.3492	0.367	0.34954	0.29685	0.17926
0.3496	0.36511	0.34898	0.29774	0.17628
0.35	0.36765	0.35135	0.29749	0.17801
0.3504	0.36608	0.3512	0.2995	0.17403
0.3508	0.36815	0.35167	0.29648	0.17719
0.3512	0.36815	0.34957	0.29736	0.17584
0.3516	0.3678	0.34994	0.29577	0.17558
0.352	0.36569	0.35181	0.29706	0.17671
0.3524	0.36799	0.35142	0.297	0.1758
0.3528	0.36773	0.35027	0.29917	0.1735
0.3532	0.36715	0.35249	0.29522	0.17531
0.3536	0.36543	0.35058	0.29648	0.17459
0.354	0.36535	0.35131	0.29531	0.17493
0.3544	0.36634	0.3524	0.2946	0.17588
0.3548	0.36519	0.35009	0.29612	0.17346
0.3552	0.36626	0.35098	0.29706	0.17489
0.3556	0.36822	0.35066	0.2971	0.17207
0.356	0.36707	0.35021	0.29739	0.17618
0.3564	0.36799	0.35375	0.29746	0.17483
0.3568	0.36788	0.35117	0.29681	0.17503
0.3572	0.3683	0.34989	0.29605	0.17332
0.3576	0.3675	0.35083	0.29496	0.17276
0.358	0.36527	0.35108	0.29734	0.17392
0.3584	0.36673	0.35071	0.29801	0.1725
0.3588	0.36347	0.35089	0.29486	0.17129
0.3592	0.36485	0.35117	0.29845	0.17099
0.3596	0.36708	0.34948	0.29551	0.17073
0.36	0.36551	0.35018	0.29399	0.17267
0.3604	0.36354	0.35305	0.29594	0.16977
0.3608	0.36608	0.34954	0.29601	0.17366
0.3612	0.36592	0.35107	0.29648	0.16968
0.3616	0.36509	0.35208	0.29774	0.17067
0.362	0.36543	0.3508	0.29492	0.17244
0.3624	0.36635	0.35379	0.2967	0.17085
0.3628	0.36666	0.34835	0.29724	0.17077
0.3632	0.36569	0.351	0.29597	0.17123
0.3636	0.36658	0.35316	0.29441	0.16985
0.364	0.36684	0.3508	0.29392	0.16929
0.3644	0.3675	0.34926	0.29637	0.17033
0.3648	0.36535	0.35036	0.29435	0.1664
0.3652	0.366	0.35264	0.29496	0.16951
0.3656	0.36535	0.35112	0.29706	0.16993
0.366	0.36582	0.35007	0.29466	0.16852
0.3664	0.36551	0.34791	0.29379	0.16985
0.3668	0.36692	0.35154	0.29658	0.17023
0.3672	0.36412	0.35039	0.29579	0.16692
0.3676	0.36689	0.35063	0.29309	0.16894
0.368	0.36396	0.35004	0.29485	0.16778
0.3684	0.366	0.35159	0.29511	0.16761
0.3688	0.36551	0.35141	0.29453	0.16787
0.3692	0.36758	0.35042	0.29366	0.16511
0.3696	0.36378	0.35208	0.29576	0.16687
0.37	0.36658	0.35144	0.2924	0.16782
0.3704	0.36585	0.35154	0.2946	0.16829
0.3708	0.36543	0.35203	0.29608	0.1667
0.3712	0.36658	0.34977	0.29618	0.16795
0.3716	0.36222	0.35144	0.29575	0.16249
0.372	0.36451	0.34981	0.29415	0.16747
0.3724	0.36428	0.34919	0.29748	0.1639
0.3728	0.36658	0.35056	0.29632	0.16657
0.3732	0.36313	0.35176	0.29184	0.16873
0.3736	0.36444	0.35036	0.29644	0.16533
0.374	0.3647	0.35353	0.29475	0.16486
0.3744	0.36428	0.35071	0.2933	0.16636
0.3748	0.36378	0.35191	0.29463	0.16386
0.3752	0.36478	0.35171	0.29482	0.1649
0.3756	0.36509	0.35235	0.29453	0.16279
0.376	0.36585	0.35141	0.29333	0.1658
0.3764	0.36378	0.35012	0.29579	0.16679
0.3768	0.36838	0.35203	0.29572	0.16348
0.3772	0.36378	0.35168	0.29273	0.16327
0.3776	0.36486	0.352	0.29264	0.16292
0.378	0.36412	0.35171	0.2946	0.16494
0.3784	0.36558	0.3499	0.29294	0.16331
0.3788	0.3637	0.35159	0.29489	0.16412
0.3792	0.36674	0.35404	0.29287	0.16404
0.3796	0.36386	0.34919	0.29579	0.16331
0.38	0.36543	0.34913	0.29472	0.16031
0.3804	0.36451	0.352	0.29475	0.1631
0.3808	0.36543	0.35135	0.29449	0.16241
0.3812	0.36509	0.35214	0.29307	0.1622
0.3816	0.36444	0.35199	0.29511	0.16185
0.382	0.36574	0.35115	0.29482	0.16031
0.3824	0.36501	0.34931	0.29475	0.16111
0.3828	0.36566	0.34849	0.29323	0.16065
0.3832	0.36486	0.35075	0.29541	0.16203
0.3836	0.36697	0.34876	0.29268	0.16053
0.384	0.3664	0.34986	0.29226	0.16301
0.3844	0.36528	0.35118	0.2932	0.16199
0.3848	0.36574	0.34717	0.29258	0.16078
0.3852	0.3641	0.34937	0.2942	0.15997
0.3856	0.3659	0.34986	0.29368	0.15778
0.386	0.36486	0.34873	0.29045	0.16161
0.3864	0.36796	0.34923	0.29255	0.16023
0.3868	0.36394	0.34904	0.29591	0.1576
0.3872	0.36444	0.34958	0.29584	0.15955
0.3876	0.36517	0.34923	0.29219	0.15787
0.388	0.36378	0.34541	0.29359	0.15899
0.3884	0.36559	0.35004	0.2928	0.15934
0.3888	0.36747	0.34846	0.29558	0.15878
0.3892	0.36754	0.35077	0.29359	0.15938
0.3896	0.36494	0.34983	0.29432	0.15849
0.39	0.36705	0.34686	0.29346	0.16019
0.3904	0.36436	0.34763	0.29497	0.15925
0.3908	0.36624	0.34919	0.29403	0.1572
0.3912	0.36444	0.34878	0.29284	0.15664
0.3916	0.36459	0.35045	0.29309	0.1589
0.392	0.36493	0.3475	0.29241	0.15801
0.3924	0.36731	0.34846	0.29129	0.15917
0.3928	0.36624	0.34869	0.29223	0.15643
0.3932	0.36574	0.34867	0.2931	0.15807
0.3936	0.36574	0.34967	0.29361	0.15788
0.394	0.36566	0.35059	0.2918	0.1567
0.3944	0.36501	0.35082	0.29064	0.15599
0.3948	0.36624	0.34946	0.29235	0.15755
0.3952	0.36566	0.34642	0.2927	0.15585
0.3956	0.3641	0.34943	0.29265	0.15832
0.396	0.36558	0.34707	0.29219	0.15776
0.3964	0.36517	0.34876	0.29254	0.15683
0.3968	0.36558	0.34715	0.29209	0.15699
0.3972	0.36517	0.34927	0.29093	0.1559
0.3976	0.36491	0.34709	0.29119	0.15473
0.398	0.36566	0.34759	0.2928	0.15332
0.3984	0.36525	0.34913	0.29022	0.15633
0.3988	0.36394	0.34935	0.29141	0.15316
0.3992	0.36451	0.34543	0.29176	0.15453
0.3996	0.36533	0.34891	0.2896	0.15401
0.4	0.36739	0.34768	0.29238	0.15235
0.4004	0.36517	0.34869	0.29093	0.15609
0.4008	0.36934	0.35048	0.29099	0.15252
0.4012	0.3677	0.34819	0.29328	0.15488
0.4016	0.36475	0.34374	0.29116	0.15155
0.402	0.36624	0.34753	0.29112	0.15376
0.4024	0.36566	0.34781	0.29076	0.1536
0.4028	0.36566	0.349	0.29041	0.1534
0.4032	0.36582	0.34718	0.29206	0.15287
0.4036	0.36697	0.34774	0.29079	0.15122
0.404	0.36877	0.34755	0.29131	0.15099
0.4044	0.36459	0.34706	0.29122	0.15126
0.4048	0.36754	0.34786	0.29051	0.15042
0.4052	0.36697	0.34651	0.29209	0.14894
0.4056	0.36796	0.34844	0.29	0.15247
0.406	0.3659	0.34322	0.28982	0.15259
0.4064	0.36746	0.34605	0.28867	0.15119
0.4068	0.3678	0.34568	0.29122	0.14689
0.4072	0.36689	0.34537	0.2885	0.14954
0.4076	0.36532	0.34718	0.2916	0.15094
0.408	0.36796	0.34612	0.29095	0.15179
0.4084	0.36927	0.34605	0.28967	0.14986
0.4088	0.36746	0.34586	0.29051	0.15014
0.4092	0.36739	0.34568	0.28808	0.14793
0.4096	0.36681	0.34586	0.28927	0.15094
0.41	0.36639	0.34601	0.28982	0.14898
0.4104	0.36631	0.34654	0.2907	0.14782
0.4108	0.36862	0.34817	0.28808	0.14813
0.4112	0.36639	0.3455	0.2908	0.14878
0.4116	0.36574	0.34482	0.28821	0.15018
0.412	0.36812	0.34709	0.28731	0.14557
0.4124	0.36854	0.34464	0.28634	0.1495
0.4128	0.36655	0.34418	0.28879	0.14834
0.4132	0.3672	0.34543	0.2863	0.14669
0.4136	0.36812	0.34586	0.28854	0.14809
0.414	0.36885	0.34608	0.28889	0.14669
0.4144	0.36673	0.34586	0.29112	0.14633
0.4148	0.36746	0.34414	0.28799	0.14769
0.4152	0.36639	0.34266	0.28714	0.14689
0.4156	0.36934	0.34584	0.28731	0.14778
0.416	0.36804	0.34482	0.28792	0.14597
0.4164	0.36566	0.34409	0.28731	0.14553
0.4168	0.36762	0.34605	0.28799	0.14698
0.4172	0.36762	0.34359	0.29008	0.1459
0.4176	0.36566	0.34737	0.28828	0.14618
0.418	0.36976	0.34252	0.28763	0.14646
0.4184	0.36705	0.34482	0.29005	0.14622
0.4188	0.36746	0.34445	0.28667	0.14573
0.4192	0.36754	0.34353	0.28786	0.14357
0.4196	0.36483	0.3435	0.28712	0.14385
0.42	0.36877	0.34145	0.28622	0.14486
0.4204	0.36911	0.34445	0.28835	0.1421
0.4208	0.36754	0.34431	0.28667	0.14258
0.4212	0.36671	0.34218	0.2895	0.14234
0.4216	0.36582	0.34317	0.28573	0.14394
0.422	0.36827	0.34077	0.28612	0.14073
0.4224	0.36827	0.34218	0.2858	0.14251
0.4228	0.36942	0.34209	0.28573	0.14193
0.4232	0.36647	0.34381	0.28614	0.14254
0.4236	0.36689	0.34378	0.28429	0.14142
0.424	0.36877	0.34151	0.28845	0.14118
0.4244	0.37091	0.34427	0.28683	0.13963
0.4248	0.36846	0.34786	0.28796	0.14075
0.4252	0.36762	0.34251	0.28457	0.14023
0.4256	0.36877	0.34156	0.28792	0.13954
0.426	0.36992	0.34268	0.28706	0.14034
0.4264	0.36647	0.34264	0.28593	0.14008
0.4268	0.37206	0.34154	0.28553	0.13924
0.4272	0.36819	0.34126	0.28879	0.13811
0.4276	0.36877	0.34154	0.28676	0.14168
0.428	0.36827	0.34072	0.28741	0.138
0.4284	0.3659	0.34178	0.28384	0.14008
0.4288	0.36647	0.34145	0.28593	0.13841
0.4292	0.36491	0.34132	0.28547	0.13768
0.4296	0.36861	0.33915	0.28547	0.13957
0.43	0.36524	0.34031	0.28651	0.13686
0.4304	0.36671	0.33958	0.28603	0.13626
0.4308	0.36746	0.34277	0.28461	0.13686
0.4312	0.36705	0.33884	0.2857	0.13599
0.4316	0.36885	0.34047	0.28612	0.13701
0.432	0.36624	0.3406	0.28429	0.1351
0.4324	0.36942	0.34191	0.28461	0.13453
0.4328	0.36778	0.3382	0.28436	0.13584
0.4332	0.36796	0.34267	0.28786	0.13455
0.4336	0.3659	0.34362	0.28496	0.13403
0.434	0.36869	0.34164	0.2859	0.13264
0.4344	0.36812	0.34289	0.28275	0.13366
0.4348	0.3677	0.34013	0.2849	0.13166
0.4352	0.36893	0.34022	0.28515	0.13162
0.4356	0.36778	0.341	0.28278	0.13301
0.436	0.36713	0.34198	0.2829	0.13091
0.4364	0.36574	0.34293	0.28364	0.13272
0.4368	0.36663	0.3409	0.28419	0.13143
0.4372	0.36697	0.34142	0.2858	0.13102
0.4376	0.36885	0.3428	0.28322	0.13324
0.438	0.36877	0.341	0.28622	0.12878
0.4384	0.37007	0.33845	0.28293	0.12994
0.4388	0.36788	0.33952	0.2819	0.12919
0.4392	0.36877	0.34157	0.28352	0.12841
0.4396	0.36679	0.34075	0.27946	0.12907
0.44	0.36548	0.3409	0.28223	0.12818
0.4404	0.36778	0.34103	0.28203	0.12879
0.4408	0.36893	0.33994	0.28181	0.12736
0.4412	0.36532	0.34209	0.28209	0.12621
0.4416	0.36582	0.34108	0.28155	0.12638
0.442	0.36869	0.3378	0.28367	0.12472
0.4424	0.369	0.33873	0.28268	0.12309
0.4428	0.3659	0.3398	0.28185	0.12671
0.4432	0.36491	0.34038	0.28015	0.12324
0.4436	0.36893	0.34044	0.28332	0.12358
0.444	0.36574	0.34207	0.28374	0.12467
0.4444	0.36927	0.33744	0.28174	0.12707
0.4448	0.36426	0.33962	0.28216	0.12372
0.4452	0.36869	0.33858	0.28136	0.12043
0.4456	0.36877	0.33887	0.28297	0.12382
0.446	0.36827	0.34038	0.27987	0.12167
0.4464	0.36697	0.34084	0.28052	0.12094
0.4468	0.3677	0.34072	0.28213	0.11925
0.4472	0.3659	0.33887	0.28322	0.11843
0.4476	0.36827	0.34213	0.283	0.11985
0.448	0.36532	0.33993	0.2811	0.12114
0.4484	0.36762	0.33912	0.28148	0.11821
0.4488	0.36598	0.34131	0.28017	0.12101
0.4492	0.36934	0.33704	0.28052	0.11734
0.4496	0.36893	0.33999	0.28145	0.11631
0.45	0.36827	0.34097	0.28268	0.11751
0.4504	0.36934	0.33971	0.28114	0.11802
0.4508	0.36533	0.33848	0.27801	0.11609
0.4512	0.36713	0.34106	0.28113	0.11553
0.4516	0.36647	0.33724	0.27901	0.11393
0.452	0.3677	0.33934	0.28114	0.11596
0.4524	0.36934	0.33763	0.28024	0.1153
0.4528	0.36976	0.33842	0.28003	0.11449
0.4532	0.36705	0.33744	0.28158	0.11406
0.4536	0.36927	0.33763	0.28155	0.11319
0.454	0.3682	0.33937	0.27914	0.11221
0.4544	0.36885	0.34052	0.27924	0.11191
0.4548	0.36532	0.33831	0.27953	0.11217
0.4552	0.36721	0.33946	0.27962	0.11221
0.4556	0.36909	0.33696	0.2793	0.11238
0.456	0.36804	0.34024	0.27921	0.1129
0.4564	0.36854	0.34134	0.27805	0.10958
0.4568	0.36713	0.33738	0.27981	0.10886
0.4572	0.36909	0.34041	0.27926	0.11079
0.4576	0.36804	0.3401	0.27936	0.10989
0.458	0.36632	0.33698	0.28089	0.11053
0.4584	0.36911	0.33848	0.27963	0.11057
0.4588	0.3641	0.33738	0.28091	0.1098
0.4592	0.36862	0.33889	0.27987	0.10941
0.4596	0.36384	0.33886	0.27994	0.1098
0.46	0.36754	0.33693	0.27924	0.10963
0.4604	0.36705	0.33597	0.27861	0.10778
0.4608	0.36598	0.33735	0.27959	0.10685
0.4612	0.36582	0.33943	0.27815	0.10826
0.4616	0.36549	0.33609	0.27956	0.10624
0.462	0.36796	0.33842	0.27934	0.10612
0.4624	0.36459	0.34011	0.2783	0.10576
0.4628	0.36582	0.33819	0.27943	0.1062
0.4632	0.36648	0.33729	0.27926	0.10539
0.4636	0.36893	0.33939	0.27707	0.10342
0.464	0.36713	0.34069	0.27914	0.10587
0.4644	0.36663	0.33732	0.28	0.10418
0.4648	0.36778	0.33676	0.27911	0.10493
0.4652	0.36606	0.33965	0.28198	0.10316
0.4656	0.36812	0.3367	0.27881	0.10329
0.466	0.36451	0.3387	0.27846	0.10437
0.4664	0.36525	0.33653	0.27891	0.10159
0.4668	0.36598	0.33702	0.27727	0.10142
0.4672	0.36476	0.33698	0.27974	0.10074
0.4676	0.36549	0.34033	0.27788	0.10263
0.468	0.36632	0.33698	0.27828	0.10223
0.4684	0.36927	0.338	0.27795	0.10275
0.4688	0.3682	0.33873	0.28107
0.4692	0.36827	0.33741	0.27668
0.4696	0.36304	0.33805	0.27798
0.47	0.36566	0.33628	0.2786
0.4704	0.36737	0.3403	0.2786
0.4708	0.36279	0.3372	0.27924
0.4712	0.36598	0.33811	0.27795
0.4716	0.36713	0.3376	0.27689
0.472	0.36927	0.33728	0.27921
0.4724	0.36885	0.34005	0.27722
0.4728	0.3659	0.33679	0.27788
0.4732	0.36663	0.33929	0.27757
0.4736	0.37008	0.33766	0.275
0.474	0.36713	0.33757	0.27552
0.4744	0.36697	0.33797	0.27815
0.4748	0.36558	0.33968	0.27722
0.4752	0.36459	0.33977	0.27757
0.4756	0.36254	0.33772	0.27609
0.476	0.36721	0.33665	0.2776
0.4764	0.36452	0.33898	0.27657
0.4768	0.36402	0.33929	0.27654
0.4772	0.36582	0.33685	0.27821
0.4776	0.36731	0.33698	0.27636
0.478	0.36574	0.33744	0.27599
0.4784	0.36319	0.33822	0.27825
0.4788	0.36459	0.33724	0.27828
0.4792	0.3641	0.33702	0.27565
0.4796	0.36418	0.33886	0.27873
0.48	0.3659	0.33631	0.27684
0.4804	0.36606	0.33929	0.27636
0.4808	0.36475	0.33861	0.27641
0.4812	0.36598	0.3387	0.2733
0.4816	0.36353	0.33744	0.27725
0.482	0.36426	0.33637	0.27517
0.4824	0.36418	0.33741	0.27568
0.4828	0.36721	0.33825	0.27562
0.4832	0.36499	0.33983	0.27562
0.4836	0.36483	0.33575	0.27719
0.484	0.36287	0.3369	0.27503
0.4844	0.3659	0.33763	0.27794
0.4848	0.36123	0.33744	0.275
0.4852	0.36533	0.33971	0.27653
0.4856	0.36402	0.33679	0.27626
0.486	0.36721	0.33823	0.2754
0.4864	0.3664	0.33575	0.27616
0.4868	0.36271	0.33898	0.2751
0.4872	0.36418	0.33839	0.27606
0.4876	0.36614	0.33757	0.27623
0.488	0.36525	0.33836	0.27782
0.4884	0.36394	0.33934	0.27541
0.4888	0.36352	0.33763	0.27551
0.4892	0.36475	0.33646	0.27452
0.4896	0.36426	0.33839	0.27742
0.49	0.36549	0.33626	0.27533
0.4904	0.36549	0.33855	0.2753
0.4908	0.36509	0.33799	0.2753
0.4912	0.36541	0.33769	0.27582
0.4916	0.36369	0.33836	0.27681
0.492	0.3636	0.33876	0.2756
0.4924	0.36345	0.33701	0.27466
0.4928	0.36533	0.33665	0.27473
0.4932	0.36459	0.33861	0.27274
0.4936	0.36345	0.33814	0.27608
0.494	0.36648	0.33612	0.27451
0.4944	0.36525	0.33701	0.27571
0.4948	0.36698	0.33572	0.27551
0.4952	0.36352	0.33429	0.27288
0.4956	0.36499	0.33477	0.27496
0.496	0.36647	0.33704	0.27335
0.4964	0.36483	0.33808	0.27394
0.4968	0.36541	0.33799	0.27649
0.4972	0.36483	0.33889	0.27213
0.4976	0.36525	0.33701	0.27309
0.498	0.36655	0.33716	0.27369
0.4984	0.36533	0.33757	0.27551
0.4988	0.36615	0.3353	0.27479
0.4992	0.36525	0.34054	0.27233
0.4996	0.3659	0.33774	0.27302
0.5	0.36426	0.33772	0.27295
0.5004	0.3636	0.33926	0.27309
0.5008	0.36369	0.33601	0.27264
0.5012	0.3645	0.33772	0.27264
0.5016	0.36541	0.33561	0.27567
0.502	0.36205	0.33758	0.274
0.5024	0.36483	0.33701	0.27087
0.5028	0.36541	0.33808	0.27349
0.5032	0.36705	0.33892	0.27336
0.5036	0.36254	0.33494	0.27059
0.504	0.36418	0.33763	0.27342
0.5044	0.36475	0.33707	0.27574
0.5048	0.36475	0.3364	0.27445
0.5052	0.36262	0.33662	0.27503
0.5056	0.36434	0.33861	0.2739
0.506	0.36556	0.33839	0.27336
0.5064	0.36655	0.33592	0.27042
0.5068	0.36287	0.33665	0.27322
0.5072	0.36262	0.33637	0.27608
0.5076	0.3623	0.33724	0.27544
0.508	0.36442	0.33646	0.27277
0.5084	0.3641	0.33996	0.2723
0.5088	0.36509	0.33769	0.27012
0.5092	0.3645	0.33671	0.27322
0.5096	0.36491	0.3403	0.27298
0.51	0.36254	0.33876	0.27271
0.5104	0.36441	0.33675	0.27417
0.5108	0.36655	0.33763	0.27076
0.5112	0.36402	0.33707	0.27053
0.5116	0.36523	0.33921	0.27445
0.512	0.36426	0.33855	0.27053
0.5124	0.36598	0.33912	0.27162
0.5128	0.36721	0.33732	0.27083
0.5132	0.36491	0.33637	0.27322
0.5136	0.36483	0.33662	0.27107
0.514	0.36467	0.33785	0.27179
0.5144	0.3636	0.33824	0.27281
0.5148	0.36679	0.3399	0.27257
0.5152	0.36336	0.33656	0.27036
0.5156	0.36794	0.33895	0.27254
0.516	0.36123	0.33808	0.27019
0.5164	0.36598	0.33827	0.27209
0.5168	0.36606	0.33831	0.27199
0.5172	0.36434	0.33965	0.26933
0.5176	0.3658	0.33852	0.27209
0.518	0.3658	0.33555	0.27145
0.5184	0.3654	0.33914	0.27212
0.5188	0.36468	0.3372	0.27053
0.5192	0.36254	0.33968	0.27039
0.5196	0.36606	0.3376	0.27005
0.52	0.36532	0.34004	0.27042
0.5204	0.36418	0.3376	0.27104
0.5208	0.36614	0.34057	0.27059
0.5212	0.36499	0.3392	0.27131
0.5216	0.36441	0.33917	0.27012
0.522	0.3622	0.3383	0.26889
0.5224	0.36598	0.33847	0.26831
0.5228	0.3645	0.33981	0.26821
0.5232	0.36246	0.33726	0.27008
0.5236	0.36434	0.33975	0.27278
0.524	0.36556	0.33824	0.27029
0.5244	0.36606	0.33905	0.27097
0.5248	0.36384	0.3395	0.27135
0.5252	0.36228	0.33779	0.26821
0.5256	0.3609	0.33875	0.27199
0.526	0.36614	0.33892	0.26988
0.5264	0.36434	0.34073	0.26978
0.5268	0.36327	0.3395	0.26947
0.5272	0.36491	0.33869	0.26926
0.5276	0.36499	0.33914	0.26852
0.528	0.36483	0.33937	0.27008
0.5284	0.36246	0.33965	0.26957
0.5288	0.36335	0.33984	0.26957
0.5292	0.36467	0.33788	0.26886
0.5296	0.36392	0.34104	0.27083
0.53	0.36147	0.33717	0.26947
0.5304	0.36606	0.34068	0.26951
0.5308	0.36426	0.34132	0.26845
0.5312	0.36402	0.34073	0.26661
0.5316	0.36262	0.34318	0.27005
0.532	0.36434	0.34138	0.27042
0.5324	0.36319	0.34211	0.26834
0.5328	0.36728	0.34141	0.26971
0.5332	0.36426	0.3407	0.26828
0.5336	0.36483	0.33871	0.26794
0.534	0.36434	0.34034	0.26838
0.5344	0.36491	0.33732	0.26766
0.5348	0.36426	0.34018	0.2678
0.5352	0.3654	0.34034	0.26726
0.5356	0.36392	0.33911	0.26576
0.536	0.36277	0.33938	0.26502
0.5364	0.3659	0.33966	0.26726
0.5368	0.36384	0.33911	0.26804
0.5372	0.36475	0.34009	0.26675
0.5376	0.36418	0.33925	0.26678
0.538	0.36311	0.3397	0.26576
0.5384	0.36303	0.34098	0.26791
0.5388	0.36598	0.34023	0.26787
0.5392	0.36598	0.34247	0.26538
0.5396	0.36392	0.34228	0.26766
0.54	0.36376	0.34037	0.26478
0.5404	0.36303	0.3412	0.26848
0.5408	0.36622	0.3411	0.26532
0.5412	0.36319	0.34056	0.26702
0.5416	0.36426	0.34323	0.26944
0.542	0.364	0.34155	0.26444
0.5424	0.36368	0.34098	0.26413
0.5428	0.36663	0.3416	0.26852
0.5432	0.36384	0.34228	0.26729
0.5436	0.36426	0.34151	0.26583
0.544	0.36392	0.33909	0.26543
0.5444	0.36376	0.34098	0.26723
0.5448	0.36335	0.34283	0.26621
0.5452	0.36327	0.33946	0.26768
0.5456	0.36327	0.3414	0.26343
0.546	0.36327	0.33989	0.2672
0.5464	0.36376	0.33869	0.26855
0.5468	0.36507	0.3398	0.26202
0.5472	0.36188	0.33975	0.26406
0.5476	0.36253	0.34044	0.2643
0.548	0.36426	0.33933	0.26495
0.5484	0.36295	0.34112	0.26614
0.5488	0.36204	0.34157	0.26573
0.5492	0.36376	0.33885	0.26549
0.5496	0.36253	0.33998	0.26223
0.55	0.36089	0.33827	0.26471
0.5504	0.36196	0.3393	0.2635
0.5508	0.3609	0.3406	0.26587
0.5512	0.36245	0.34205	0.26399
0.5516	0.35941	0.33846	0.26308
0.552	0.36196	0.34138	0.26757
0.5524	0.36279	0.34093	0.26478
0.5528	0.36319	0.33933	0.26649
0.5532	0.36499	0.34174	0.26723
0.5536	0.36147	0.34165	0.26448
0.554	0.36212	0.34082	0.26597
0.5544	0.36311	0.34121	0.26401
0.5548	0.36139	0.34096	0.2659
0.5552	0.36269	0.34101	0.26413
0.5556	0.36147	0.34132	0.26193
0.556	0.36204	0.34087	0.26465
0.5564	0.36352	0.33798	0.26269
0.5568	0.36089	0.34115	0.26376
0.5572	0.36352	0.34084	0.26447
0.5576	0.36196	0.34132	0.26153
0.558	0.36352	0.34023	0.26343
0.5584	0.36311	0.34061	0.2635
0.5588	0.36287	0.34101	0.26554
0.5592	0.3618	0.33827	0.26543
0.5596	0.36196	0.34169	0.26407
0.56	0.36311	0.34093	0.26432
0.5604	0.36368	0.33989	0.26414
0.5608	0.36065	0.34096	0.26283
0.5612	0.36253	0.34236	0.26373
0.5616	0.36139	0.33925	0.26353
0.562	0.35983	0.33981	0.26316
0.5624	0.36123	0.34093	0.26472
0.5628	0.36147	0.34183	0.26374
0.5632	0.36262	0.33908	0.26313
0.5636	0.36089	0.33978	0.26527
0.564	0.36204	0.33847	0.26425
0.5644	0.36155	0.34163	0.26479
0.5648	0.36196	0.33967	0.26384
0.5652	0.36212	0.33802	0.26397
0.5656	0.3622	0.34011	0.2636
0.566	0.36147	0.34181	0.26525
0.5664	0.3622	0.34132	0.2616
0.5668	0.35951	0.34025	0.26487
0.5672	0.36311	0.33911	0.26517
0.5676	0.35909	0.33939	0.26344
0.568	0.36269	0.34073	0.26191
0.5684	0.36188	0.34138	0.26127
0.5688	0.36139	0.33847	0.26347
0.5692	0.3622	0.34205	0.26279
0.5696	0.36048	0.34096	0.26374
0.57	0.36319	0.34009	0.26191
0.5704	0.36245	0.33962	0.26344
0.5708	0.36008	0.34032	0.25978
0.5712	0.36245	0.3392	0.26385
0.5716	0.36171	0.34037	0.2614
0.572	0.36212	0.33704	0.26221
0.5724	0.36155	0.3395	0.26359
0.5728	0.36285	0.33981	0.26347
0.5732	0.35975	0.33825	0.26447
0.5736	0.35738	0.34015	0.26362
0.574	0.3604	0.33945	0.26399
0.5744	0.36089	0.33715	0.26334
0.5748	0.35943	0.33802	0.26188
0.5752	0.36139	0.33791	0.26324
0.5756	0.35951	0.3357	0.26243
0.576	0.36212	0.33905	0.26274
0.5764	0.35787	0.33788	0.26181
0.5768	0.36008	0.33802	0.26223
0.5772	0.35991	0.33729	0.26153
0.5776	0.35975	0.33788	0.26122
0.578	0.36056	0.33791	0.26283
0.5784	0.35942	0.33647	0.26168
0.5788	0.35853	0.34122	0.26038
0.5792	0.3591	0.33797	0.26264
0.5796	0.36147	0.34045	0.26158
0.58	0.35876	0.33832	0.26039
0.5804	0.35941	0.33895	0.26006
0.5808	0.35983	0.33656	0.26412
0.5812	0.36097	0.33681	0.26307
0.5816	0.35975	0.33748	0.26168
0.582	0.3591	0.338	0.2606
0.5824	0.35951	0.33687	0.26293
0.5828	0.35803	0.33626	0.26284
0.5832	0.36147	0.33572	0.26094
0.5836	0.35852	0.3369	0.26216
0.584	0.35975	0.34027	0.26067
0.5844	0.36139	0.33679	0.26254
0.5848	0.35959	0.33592	0.26183
0.5852	0.36228	0.33794	0.26151
0.5856	0.36097	0.33732	0.26109
0.586	0.35975	0.33679	0.2619
0.5864	0.3604	0.33704	0.26155
0.5868	0.35917	0.33704	0.26208
0.5872	0.35852	0.33807	0.26216
0.5876	0.3591	0.33629	0.26111
0.588	0.35975	0.33715	0.26258
0.5884	0.35558	0.33665	0.25947
0.5888	0.35729	0.33604	0.26073
0.5892	0.36105	0.33788	0.2623
0.5896	0.35852	0.33629	0.26089
0.59	0.3577	0.33617	0.26153
0.5904	0.36089	0.33592	0.26001
0.5908	0.36008	0.33601	0.26069
0.5912	0.36147	0.33634	0.25938
0.5916	0.36048	0.33704	0.2598
0.592	0.35836	0.33326	0.26044
0.5924	0.35893	0.33615	0.25973
0.5928	0.36024	0.33859	0.25921
0.5932	0.36089	0.33525	0.25908
0.5936	0.3604	0.3364	0.26168
0.594	0.35959	0.33326	0.2598
0.5944	0.3573	0.33452	0.25869
0.5948	0.35959	0.33679	0.2598
0.5952	0.3586	0.33617	0.25995
0.5956	0.35754	0.33606	0.26057
0.596	0.3591	0.33393	0.26128
0.5964	0.36154	0.33429	0.26096
0.5968	0.3586	0.3357	0.25814
0.5972	0.35983	0.33623	0.25982
0.5976	0.35959	0.33296	0.26014
0.598	0.35983	0.33525	0.25727
0.5984	0.35868	0.33615	0.25885
0.5988	0.35901	0.33351	0.26218
0.5992	0.35631	0.33711	0.25804
0.5996	0.35762	0.33435	0.25998
0.6	0.35967	0.33297	0.26109
0.6004	0.35893	0.33609	0.2591
0.6008	0.35696	0.33466	0.25907
0.6012	0.35975	0.33916	0.25846
0.6016	0.3572	0.33576	0.26096
0.602	0.35762	0.33399	0.26031
0.6024	0.35884	0.33465	0.25846
0.6028	0.35861	0.33561	0.25973
0.6032	0.35959	0.33569	0.25888
0.6036	0.3586	0.33802	0.25752
0.604	0.3586	0.33609	0.25885
0.6044	0.3586	0.33477	0.26001
0.6048	0.35917	0.33429	0.26005
0.6052	0.35639	0.33662	0.25791
0.6056	0.35876	0.33474	0.25821
0.606	0.35754	0.33612	0.257
0.6064	0.35876	0.33601	0.25742
0.6068	0.35705	0.33707	0.2594
0.6072	0.35598	0.33438	0.26041
0.6076	0.35697	0.33597	0.25872
0.608	0.35737	0.33597	0.2596
0.6084	0.3568	0.33836	0.25843
0.6088	0.35476	0.33539	0.25885
0.6092	0.35378	0.33794	0.25643
0.6096	0.35959	0.33719	0.2592
0.61	0.35729	0.33802	0.25788
0.6104	0.35942	0.33729	0.25798
0.6108	0.35827	0.33519	0.25759
0.6112	0.35885	0.33679	0.25888
0.6116	0.35697	0.33399	0.25677
0.612	0.3577	0.33634	0.25668
0.6124	0.35795	0.33576	0.25911
0.6128	0.35917	0.33683	0.25824
0.6132	0.35884	0.33797	0.25697
0.6136	0.35885	0.33452	0.25846
0.614	0.3586	0.33855	0.25737
0.6144	0.35631	0.33558	0.25794
0.6148	0.35795	0.33886	0.25939
0.6152	0.3577	0.33516	0.25752
0.6156	0.35647	0.33637	0.2568
0.616	0.35893	0.33864	0.25762
0.6164	0.35983	0.3362	0.25514
0.6168	0.35967	0.3372	0.2565
0.6172	0.35999	0.33693	0.25838
0.6176	0.35934	0.33561	0.25626
0.618	0.35835	0.33503	0.25307
0.6184	0.35934	0.3372	0.25571
0.6188	0.35926	0.33451	0.25371
0.6192	0.35902	0.33503	0.25613
0.6196	0.35827	0.33681	0.25794
0.62	0.35688	0.33458	0.25477
0.6204	0.35917	0.33592	0.25361
0.6208	0.35795	0.33581	0.25455
0.6212	0.35868	0.33807	0.25593
0.6216	0.35754	0.3334	0.25759
0.622	0.35983	0.33444	0.25358
0.6224	0.35811	0.34015	0.256
0.6228	0.35639	0.3354	0.25436
0.6232	0.35697	0.33855	0.25506
0.6236	0.36015	0.33693	0.25697
0.624	0.36097	0.3339	0.25571
0.6244	0.36097	0.33522	0.25787
0.6248	0.35705	0.33513	0.25455
0.6252	0.35991	0.33595	0.25503
0.6256	0.35721	0.33522	0.2561
0.626	0.35721	0.33684	0.25526
0.6264	0.35574	0.33488	0.25603
0.6268	0.36049	0.33586	0.25574
0.6272	0.35558	0.33463	0.25445
0.6276	0.35811	0.3357	0.25477
0.628	0.35917	0.33729	0.253
0.6284	0.35868	0.33494	0.25548
0.6288	0.3604	0.33622	0.2539
0.6292	0.35967	0.33816	0.25483
0.6296	0.35762	0.33497	0.25616
0.63	0.35861	0.33525	0.25413
0.6304	0.35762	0.33626	0.25339
0.6308	0.36058	0.33507	0.25404
0.6312	0.35786	0.3362	0.25397
0.6316	0.36015	0.33754	0.25371
0.632	0.35835	0.33412	0.25476
0.6324	0.3586	0.33626	0.25426
0.6328	0.35926	0.33726	0.25339
0.6332	0.35819	0.33541	0.25284
0.6336	0.36155	0.33357	0.25271
0.634	0.36105	0.33492	0.25516
0.6344	0.36212	0.33581	0.25397
0.6348	0.35746	0.33531	0.25213
0.6352	0.36155	0.33659	0.25344
0.6356	0.36015	0.33475	0.25068
0.636	0.36082	0.33592	0.25371
0.6364	0.35926	0.33645	0.25238
0.6368	0.36179	0.33528	0.25206
0.6372	0.36163	0.33427	0.25213
0.6376	0.35803	0.33483	0.25545
0.638	0.36015	0.33541	0.2532
0.6384	0.36171	0.33832	0.25397
0.6388	0.36147	0.33522	0.24849
0.6392	0.35983	0.33522	0.25325
0.6396	0.36171	0.33581	0.25009
0.64	0.36097	0.33519	0.25184
0.6404	0.35991	0.33483	0.25058
0.6408	0.36041	0.33502	0.25094
0.6412	0.35812	0.33712	0.25242
0.6416	0.36408	0.33414	0.2509
0.642	0.35991	0.33424	0.25174
0.6424	0.35763	0.33668	0.25274
0.6428	0.36114	0.33283	0.25188
0.6432	0.35812	0.3367	0.25036
0.6436	0.35705	0.3376	0.25364
0.644	0.36049	0.33681	0.25039
0.6444	0.35959	0.33771	0.25029
0.6448	0.35918	0.33686	0.25184
0.6452	0.35713	0.33782	0.25288
0.6456	0.36106	0.3388	0.24755
0.646	0.35705	0.33351	0.25162
0.6464	0.35942	0.337	0.25122
0.6468	0.35942	0.33804	0.25206
0.6472	0.35926	0.33735	0.25061
0.6476	0.36065	0.33639	0.25029
0.648	0.3609	0.33547	0.24953
0.6484	0.35877	0.33606	0.25187
0.6488	0.36155	0.33581	0.25374
0.6492	0.35934	0.33732	0.25145
0.6496	0.36343	0.33406	0.253
0.65	0.36229	0.33483	0.2511
0.6504	0.3622	0.33524	0.25165
0.6508	0.35869	0.33536	0.25307
0.6512	0.35983	0.33712	0.25029
0.6516	0.36228	0.33549	0.25
0.652	0.35934	0.33574	0.25107
0.6524	0.36155	0.33773	0.25039
0.6528	0.35918	0.33584	0.25007
0.6532	0.36105	0.337	0.25058
0.6536	0.36106	0.33541	0.25007
0.654	0.35942	0.33657	0.25072
0.6544	0.35934	0.33598	0.25068
0.6548	0.35853	0.33413	0.24611
0.6552	0.36041	0.3357	0.24946
0.6556	0.35942	0.33573	0.25245
0.656	0.35934	0.33474	0.25155
0.6564	0.36033	0.33883	0.24914
0.6568	0.35975	0.33402	0.24952
0.6572	0.36237	0.33506	0.25017
0.6576	0.35983	0.33497	0.24849
0.658	0.36007	0.33309	0.24733
0.6584	0.36278	0.33595	0.24859
0.6588	0.35992	0.33513	0.24778
0.6592	0.35869	0.33696	0.24849
0.6596	0.35901	0.33762	0.25029
0.66	0.36041	0.33668	0.25024
0.6604	0.36	0.33591	0.24766
0.6608	0.35934	0.33419	0.24884
0.6612	0.36229	0.33545	0.24842
0.6616	0.35934	0.33315	0.24974
0.662	0.36024	0.33318	0.24788
0.6624	0.35934	0.33465	0.24845
0.6628	0.36278	0.33295	0.25089
0.6632	0.36041	0.33541	0.2502
0.6636	0.3613	0.33603	0.24782
0.664	0.35975	0.3329	0.24846
0.6644	0.36082	0.33436	0.25007
0.6648	0.36017	0.33413	0.24871
0.6652	0.35942	0.33545	0.25033
0.6656	0.35975	0.33332	0.25075
0.666	0.36106	0.33309	0.24568
0.6664	0.35812	0.33393	0.24702
0.6668	0.36229	0.33275	0.24746
0.6672	0.35812	0.33668	0.24852
0.6676	0.3613	0.33684	0.24832
0.668	0.36343	0.33441	0.24849
0.6684	0.36098	0.33374	0.24727
0.6688	0.36041	0.3353	0.24778
0.6692	0.36164	0.33606	0.24965
0.6696	0.35697	0.33228	0.24875
0.67	0.36074	0.33318	0.24746
0.6704	0.35795	0.33424	0.24763
0.6708	0.35984	0.33629	0.24739
0.6712	0.3591	0.33371	0.24746
0.6716	0.36065	0.33516	0.2502
0.672	0.36286	0.33183	0.24707
0.6724	0.36163	0.33488	0.248
0.6728	0.36229	0.33603	0.24823
0.6732	0.35836	0.3341	0.24523
0.6736	0.36	0.33449	0.24901
0.674	0.36205	0.33483	0.24505
0.6744	0.3591	0.335	0.24746
0.6748	0.35992	0.33264	0.2456
0.6752	0.36262	0.33419	0.24681
0.6756	0.35992	0.33598	0.24614
0.676	0.36033	0.33326	0.24517
0.6764	0.36041	0.33575	0.24603
0.6768	0.36255	0.33227	0.24585
0.6772	0.35713	0.33506	0.24553
0.6776	0.35828	0.33413	0.24643
0.678	0.35886	0.33404	0.24478
0.6784	0.35852	0.33383	0.24586
0.6788	0.36156	0.33471	0.24527
0.6792	0.36	0.33374	0.24906
0.6796	0.36147	0.33407	0.24477
0.68	0.36106	0.33639	0.24576
0.6804	0.35836	0.33575	0.24395
0.6808	0.36179	0.33475	0.24714
0.6812	0.35983	0.33413	0.2461
0.6816	0.36098	0.33514	0.24736
0.682	0.36041	0.33471	0.24578
0.6824	0.35844	0.33245	0.24484
0.6828	0.36033	0.33427	0.2435
0.6832	0.35927	0.33471	0.24475
0.6836	0.3609	0.33404	0.24478
0.684	0.36057	0.33298	0.24511
0.6844	0.36171	0.33514	0.24302
0.6848	0.36041	0.33615	0.2472
0.6852	0.36156	0.3348	0.24636
0.6856	0.36106	0.33407	0.2436
0.686	0.36007	0.33737	0.24357
0.6864	0.35861	0.33698	0.24471
0.6868	0.36009	0.33281	0.24604
0.6872	0.35984	0.33525	0.24436
0.6876	0.35934	0.33636	0.24649
0.688	0.35951	0.33301	0.2447
0.6884	0.35705	0.33245	0.24508
0.6888	0.36024	0.33443	0.2438
0.6892	0.36049	0.33413	0.24196
0.6896	0.35632	0.33614	0.24554
0.69	0.36033	0.3348	0.2448
0.6904	0.35934	0.33275	0.24524
0.6908	0.35927	0.33475	0.24408
0.6912	0.36057	0.33384	0.24665
0.6916	0.35934	0.33545	0.24499
0.692	0.35992	0.33449	0.24365
0.6924	0.35877	0.33698	0.24196
0.6928	0.35844	0.33536	0.2435
0.6932	0.36024	0.33511	0.24487
0.6936	0.35771	0.33402	0.24223
0.694	0.35901	0.33304	0.24607
0.6944	0.35869	0.33609	0.24342
0.6948	0.35861	0.33443	0.2438
0.6952	0.35934	0.33318	0.24398
0.6956	0.35763	0.33354	0.24403
0.696	0.35992	0.33587	0.24367
0.6964	0.36033	0.33225	0.24267
0.6968	0.35828	0.33296	0.24216
0.6972	0.35804	0.33309	0.24151
0.6976	0.35607	0.33348	0.24277
0.698	0.35714	0.33559	0.24393
0.6984	0.35763	0.3348	0.24165
0.6988	0.36098	0.3343	0.24206
0.6992	0.35763	0.33348	0.24355
0.6996	0.3569	0.33321	0.24396
0.7	0.35934	0.33298	0.24301
0.7004	0.3569	0.33569	0.24387
0.7008	0.35811	0.33304	0.24318
0.7012	0.35681	0.33475	0.2413
0.7016	0.35705	0.33315	0.24301
0.702	0.3578	0.33301	0.24417
0.7024	0.35983	0.3334	0.24267
0.7028	0.35722	0.33337	0.24355
0.7032	0.35861	0.33413	0.2408
0.7036	0.35795	0.33278	0.24181
0.704	0.35763	0.33413	0.24218
0.7044	0.35386	0.33209	0.24017
0.7048	0.35445	0.33539	0.24355
0.7052	0.35934	0.33274	0.24329
0.7056	0.35657	0.33309	0.24339
0.706	0.35763	0.33422	0.24256
0.7064	0.35476	0.33404	0.24195
0.7068	0.35722	0.33466	0.24212
0.7072	0.35902	0.33148	0.24213
0.7076	0.35672	0.33321	0.24092
0.708	0.35771	0.3322	0.2416
0.7084	0.35632	0.33142	0.24355
0.7088	0.35665	0.33648	0.24198
0.7092	0.35534	0.33324	0.24123
0.7096	0.35599	0.33304	0.24112
0.71	0.35787	0.33142	0.24038
0.7104	0.3569	0.33432	0.24195
0.7108	0.35567	0.33181	0.2428
0.7112	0.35714	0.33139	0.24286
0.7116	0.35992	0.33284	0.24249
0.712	0.35722	0.33209	0.24099
0.7124	0.35714	0.33256	0.24071
0.7128	0.3542	0.33181	0.24072
0.7132	0.3582	0.33368	0.24027
0.7136	0.35428	0.33368	0.24256
0.714	0.35975	0.33295	0.24065
0.7144	0.35599	0.33181	0.24133
0.7148	0.35772	0.33371	0.24335
0.7152	0.35878	0.32798	0.24148
0.7156	0.35886	0.33236	0.24072
0.716	0.35657	0.33136	0.24164
0.7164	0.35649	0.33562	0.24133
0.7168	0.35828	0.33127	0.24089
0.7172	0.35509	0.33307	0.24246
0.7176	0.35665	0.3327	0.24061
0.718	0.35828	0.33309	0.24181
0.7184	0.35591	0.33402	0.23969
0.7188	0.35608	0.33301	0.24021
0.7192	0.35551	0.33265	0.24027
0.7196	0.35616	0.33245	0.23795
0.72	0.35722	0.33413	0.24212
0.7204	0.35624	0.33049	0.24034
0.7208	0.35869	0.33301	0.23918
0.7212	0.35878	0.33222	0.24061
0.7216	0.35828	0.33548	0.24065
0.722	0.35657	0.33165	0.24177
0.7224	0.35943	0.33505	0.23856
0.7228	0.35485	0.33402	0.24037
0.7232	0.35763	0.33151	0.2399
0.7236	0.35893	0.33049	0.24003
0.724	0.3578	0.33304	0.24116
0.7244	0.35485	0.33172	0.23986
0.7248	0.35714	0.33332	0.23948
0.7252	0.3569	0.33304	0.23846
0.7256	0.3556	0.33321	0.24003
0.726	0.35739	0.33368	0.24013
0.7264	0.35657	0.33049	0.2373
0.7268	0.35714	0.33407	0.24068
0.7272	0.35591	0.33371	0.24088
0.7276	0.35681	0.33239	0.23979
0.728	0.35714	0.33486	0.24006
0.7284	0.35673	0.33437	0.23948
0.7288	0.35772	0.33533	0.23828
0.7292	0.35787	0.33218	0.23829
0.7296	0.3582	0.33413	0.23812
0.73	0.35649	0.33368	0.23883
0.7304	0.3569	0.33236	0.23607
0.7308	0.35584	0.33239	0.23883
0.7312	0.35779	0.33539	0.23669
0.7316	0.35485	0.33424	0.23819
0.732	0.35975	0.33575	0.24003
0.7324	0.35551	0.33275	0.23767
0.7328	0.35632	0.33203	0.23856
0.7332	0.35705	0.33309	0.23935
0.7336	0.35772	0.33618	0.23846
0.734	0.3542	0.33471	0.23491
0.7344	0.35893	0.33357	0.23733
0.7348	0.35943	0.33265	0.23556
0.7352	0.35591	0.33398	0.23812
0.7356	0.35862	0.33438	0.23574
0.736	0.35755	0.33416	0.23645
0.7364	0.35787	0.3353	0.23798
0.7368	0.35591	0.33262	0.23672
0.7372	0.35437	0.3353	0.23672
0.7376	0.3569	0.33377	0.23617
0.738	0.35787	0.33494	0.23709
0.7384	0.3573	0.3358	0.23897
0.7388	0.35608	0.33407	0.2359
0.7392	0.35697	0.33589	0.23314
0.7396	0.35739	0.33562	0.23437
0.74	0.35575	0.33327	0.23624
0.7404	0.35714	0.33418	0.23574
0.7408	0.35657	0.33268	0.23403
0.7412	0.35648	0.33575	0.23549
0.7416	0.35714	0.33309	0.23277
0.742	0.3551	0.33306	0.23716
0.7424	0.35894	0.33359	0.23464
0.7428	0.35828	0.33236	0.23583
0.7432	0.35657	0.33668	0.23318
0.7436	0.35681	0.33429	0.23665
0.744	0.35901	0.33295	0.23171
0.7444	0.35633	0.33007	0.23417
0.7448	0.35787	0.3355	0.23229
0.7452	0.35665	0.33432	0.23256
0.7456	0.35828	0.3345	0.23434
0.746	0.36016	0.33436	0.23427
0.7464	0.35534	0.33662	0.23563
0.7468	0.35828	0.33365	0.23392
0.7472	0.35657	0.33301	0.23482
0.7476	0.3573	0.33036	0.23073
0.748	0.35526	0.33122	0.23386
0.7484	0.35453	0.3343	0.23189
0.7488	0.35372	0.33455	0.23345
0.7492	0.3578	0.33363	0.2344
0.7496	0.3573	0.33407	0.2341
0.75	0.35616	0.33536	0.23447
0.7504	0.35469	0.33334	0.23229
0.7508	0.35666	0.33094	0.23141
0.7512	0.35787	0.33297	0.23196
0.7516	0.35567	0.3334	0.23171
0.752	0.35502	0.33603	0.23033
0.7524	0.35722	0.33363	0.23233
0.7528	0.3578	0.33265	0.23254
0.7532	0.35771	0.33631	0.23216
0.7536	0.35722	0.33262	0.23073
0.754	0.35632	0.33215	0.23355
0.7544	0.35624	0.33482	0.2343
0.7548	0.35559	0.33209	0.23199
0.7552	0.3542	0.33559	0.23162
0.7556	0.3586	0.33301	0.23481
0.756	0.35599	0.33432	0.23127
0.7564	0.35445	0.332	0.23144
0.7568	0.35372	0.33268	0.22903
0.7572	0.35575	0.33397	0.23117
0.7576	0.3573	0.33103	0.23352
0.758	0.35893	0.33277	0.23005
0.7584	0.35493	0.33059	0.23066
0.7588	0.3551	0.33003	0.229
0.7592	0.35559	0.33265	0.2327
0.7596	0.35641	0.331	0.23107
0.76	0.35534	0.33176	0.23001
0.7604	0.35714	0.3313	0.23019
0.7608	0.35568	0.33139	0.23169
0.7612	0.35339	0.33039	0.23001
0.7616	0.35518	0.33259	0.2305
0.762	0.35771	0.33064	0.23359
0.7624	0.3573	0.33033	0.23298
0.7628	0.35502	0.33036	0.22925
0.7632	0.35437	0.33044	0.23059
0.7636	0.35453	0.33106	0.22903
0.764	0.35493	0.33324	0.22933
0.7644	0.35436	0.32887	0.22853
0.7648	0.35616	0.33133	0.23026
0.7652	0.35387	0.33165	0.22815
0.7656	0.35543	0.32874	0.23173
0.766	0.35257	0.32906	0.23179
0.7664	0.35216	0.33136	0.22815
0.7668	0.35428	0.33039	0.22761
0.7672	0.35191	0.33144	0.22978
0.7676	0.35322	0.33341	0.22869
0.768	0.35297	0.33171	0.23029
0.7684	0.35427	0.33153	0.22945
0.7688	0.35485	0.33009	0.23124
0.7692	0.35314	0.33171	0.2291
0.7696	0.35478	0.3288	0.23026
0.77	0.35274	0.33047	0.22908
0.7704	0.35445	0.33033	0.22699
0.7708	0.35495	0.3263	0.23006
0.7712	0.3547	0.33068	0.22727
0.7716	0.35331	0.32936	0.22799
0.772	0.35322	0.32883	0.23107
0.7724	0.35404	0.33171	0.22969
0.7728	0.35502	0.33044	0.22828
0.7732	0.35395	0.3288	0.23019
0.7736	0.35404	0.33039	0.22999
0.774	0.35445	0.33071	0.22643
0.7744	0.35428	0.32813	0.22925
0.7748	0.35485	0.32868	0.22524
0.7752	0.35274	0.32921	0.22692
0.7756	0.35274	0.33016	0.2288
0.776	0.35585	0.33053	0.22687
0.7764	0.35543	0.33136	0.22807
0.7768	0.35666	0.32941	0.22462
0.7772	0.35657	0.33075	0.2288
0.7776	0.35322	0.32995	0.22817
0.778	0.35502	0.32957	0.22817
0.7784	0.3533	0.33086	0.22799
0.7788	0.35274	0.33206	0.22815
0.7792	0.35575	0.32974	0.23152
0.7796	0.35551	0.33083	0.22789
0.78	0.3551	0.33083	0.22731
0.7804	0.35722	0.33441	0.22726
0.7808	0.35478	0.3296	0.22588
0.7812	0.35274	0.33053	0.22795
0.7816	0.35445	0.33025	0.22636
0.782	0.35109	0.32972	0.22361
0.7824	0.35787	0.33019	0.22799
0.7828	0.35454	0.33028	0.2256
0.7832	0.35322	0.32734	0.22663
0.7836	0.35412	0.33106	0.22433
0.784	0.35404	0.33092	0.22459
0.7844	0.35362	0.32951	0.22795
0.7848	0.35397	0.33048	0.22782
0.7852	0.35495	0.3308	0.22552
0.7856	0.35314	0.33128	0.22792
0.786	0.35583	0.3305	0.22433
0.7864	0.35314	0.33189	0.22772
0.7868	0.35266	0.33021	0.22361
0.7872	0.35412	0.3333	0.22687
0.7876	0.35379	0.3296	0.22609
0.788	0.35535	0.33162	0.22668
0.7884	0.35478	0.3327	0.22399
0.7888	0.35372	0.33083	0.22436
0.7892	0.35307	0.33112	0.22505
0.7896	0.35322	0.3319	0.22426
0.79	0.35445	0.33162	0.22399
0.7904	0.35266	0.33215	0.22519
0.7908	0.35502	0.32893	0.22301
0.7912	0.3537	0.32998	0.22461
0.7916	0.35274	0.33151	0.22392
0.792	0.35664	0.33128	0.22135
0.7924	0.3547	0.33215	0.22616
0.7928	0.35543	0.32987	0.22512
0.7932	0.35649	0.33089	0.22512
0.7936	0.35428	0.33037	0.2237
0.794	0.35558	0.3308	0.22221
0.7944	0.35551	0.33318	0.22312
0.7948	0.35478	0.33092	0.22363
0.7952	0.35412	0.33192	0.22386
0.7956	0.35681	0.33122	0.22386
0.796	0.35216	0.33048	0.22276
0.7964	0.35387	0.33183	0.22189
0.7968	0.35485	0.33416	0.22072
0.7972	0.35379	0.33092	0.2228
0.7976	0.35436	0.3329	0.22254
0.798	0.35501	0.33453	0.22167
0.7984	0.35223	0.33197	0.22153
0.7988	0.35493	0.33122	0.22396
[truncated: 4,024 more rows]

## Sheet: absorption-cross section
acetaldehyde absorption cross section
T/K	s (m2/mol)
728.2	3.35
739.2	3.36
755.8	3
757.3	3.25
785.3	2.9
787	3.16
803.2	3.2
812.9	3.23
827.2	3.2
1191.6	2.36
1214.4	2.4
1248.6	2.01
1251.6	2.13
1305.1	2
1309.5	2.01
1312.9	2.18
1366.3	2.14
1395.9	2.07
